# Supplementary material for: Iridoid Glycosides and Coumarin Glycoside Derivatives from the Roots of Nymphoides peltata and Their In Vitro Wound Healing Properties
Source: MDPI journal article supplement (doi:10.3390/ijms25021268), 2024-01-19

# Iridoid Glycosides and Coumarin Glycoside Derivatives from the Roots of *Nymphoides peltata* and Their In Vitro Wound Healing Properties

Tae-Young Kim <sup>1,†</sup>, Bum Soo Lee <sup>2,†</sup>, Beom-Geun Jo <sup>1</sup>, Seong Pil Heo <sup>3</sup>, Young Suk Jung <sup>1</sup>,  
Su-Nam Kim <sup>3,4</sup>, Ki Hyun Kim <sup>2,\*</sup> and Min Hye Yang <sup>1,\*</sup>

- <sup>1</sup> Department of Pharmacy, College of Pharmacy and Research Institute for Drug Development, Pusan National University, Busan 46241, Republic of Korea; taeyour@pusan.ac.kr (T.-Y.K.); bg\_jo@pusan.ac.kr (B.-G.J.)
- <sup>2</sup> School of Pharmacy, Sungkyunkwan University, Suwon 16419, Republic of Korea; kosboybs@skku.edu
- <sup>3</sup> Natural Products Research Institute, Korea Institute of Science and Technology, Gangneung 25451, Republic of Korea; 123045@kist.re.kr (S.P.H.); snkim@kist.re.kr (S.-N.K.)
- <sup>4</sup> Division of Bio-Medical Science and Technology, KIST School, University of Science and Technology, Seoul 02792, Republic of Korea
- \* Correspondence: khkim83@skku.edu (K.H.K.); mhyang@pusan.ac.kr (M.H.Y.); Tel.: +82-51-510-2811 (M.H.Y.)
- † These authors contributed equally to this work.

**Citation:** Kim, T.-Y.; Lee, B.S.; Jo, B.-G.; Heo, S.P.; Jung, Y.S.; Kim, S.-N.; Kim, K.H.; Yang, M.H. Iridoid Glycosides and Coumarin Glycoside Derivatives from the Roots of *Nymphoides peltata* and Their In Vitro Wound Healing Properties. *Int. J. Mol. Sci.* **2024**, *25*, x. <https://doi.org/10.3390/xxxxx>

Academic Editor: Arnaud Bianchi

Received: 16 December 2023

Revised: 12 January 2024

Accepted: 17 January 2024

Published: 19 January 2024

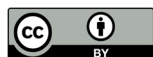

**Copyright:** © 2024 by the authors. Submitted for possible open access publication under the terms and conditions of the Creative Commons Attribution (CC BY) license (<https://creativecommons.org/licenses/by/4.0/>).

## Contents of Supplementary material

**Table S1.**  $^1\text{H}$  and  $^{13}\text{C}$  NMR Spectrum Data of Compounds **1-4**

**Figure S1.**  $^1\text{H}$  NMR spectrum of **1** in  $\text{DMSO-}d_6$  (400 MHz)

**Figure S2.**  $^1\text{H}$  NMR spectrum of **2** in  $\text{DMSO-}d_6$  (400 MHz)

**Figure S3.**  $^1\text{H}$  NMR spectrum of **3** in  $\text{DMSO-}d_6$  (400 MHz)

**Figure S4.**  $^1\text{H}$  NMR spectrum of **4** in  $\text{DMSO-}d_6$  (500 MHz)

**Figure S5.** HR-ESI-MS data of **5**

**Figure S6.**  $^1\text{H}$  NMR spectrum of **5** in  $\text{DMSO-}d_6$  (400 MHz)

**Figure S7.**  $^{13}\text{C}$  NMR spectrum of **5** in  $\text{DMSO-}d_6$  (100 MHz)

**Figure S8.**  $^1\text{H-}^1\text{H}$  COSY spectrum of **5** in  $\text{DMSO-}d_6$

**Figure S9.** HSQC spectrum of **5** in  $\text{DMSO-}d_6$

**Figure S10.** HMBC spectrum of **5** in  $\text{DMSO-}d_6$

**Figure S11.** UV/PDA spectrum of **5**

**Figure S12.** HR-ESI-MS data of **6**

**Figure S13.**  $^1\text{H}$  NMR spectrum of **6** in  $\text{DMSO-}d_6$  (400 MHz)

**Figure S14.**  $^{13}\text{C}$  NMR spectrum of **6** in  $\text{DMSO-}d_6$  (125 MHz)

**Figure S15.**  $^1\text{H-}^1\text{H}$  COSY spectrum of **6** in  $\text{DMSO-}d_6$

**Figure S16.** HSQC spectrum of **6** in  $\text{DMSO-}d_6$

**Figure S17.** HMBC spectrum of **6** in  $\text{DMSO-}d_6$

**Figure S18.** UV/PDA spectrum of **6**

**Figure S19.** Wound healing area of compounds isolated from *N. peltate*

**Table S1.**  $^1\text{H}$  and  $^{13}\text{C}$  NMR spectrum data of compounds **1~4**

| Position         | Compound 1                              |                                                    | Compound 2                              |                                                    | Compound 3                              |                                                    | Compound 4                              |                                                    |
|------------------|-----------------------------------------|----------------------------------------------------|-----------------------------------------|----------------------------------------------------|-----------------------------------------|----------------------------------------------------|-----------------------------------------|----------------------------------------------------|
|                  | $\delta_{\text{C}}$ , type <sup>c</sup> | $\delta_{\text{H}}$ ( <i>J</i> in Hz) <sup>a</sup> | $\delta_{\text{C}}$ , type <sup>d</sup> | $\delta_{\text{H}}$ ( <i>J</i> in Hz) <sup>a</sup> | $\delta_{\text{C}}$ , type <sup>c</sup> | $\delta_{\text{H}}$ ( <i>J</i> in Hz) <sup>a</sup> | $\delta_{\text{C}}$ , type <sup>c</sup> | $\delta_{\text{H}}$ ( <i>J</i> in Hz) <sup>b</sup> |
| 1                | 96.7 CH                                 | 5.46 d (2.0)                                       | 95.7 CH                                 | 5.36 (d, 2.0)                                      | 96.3 CH                                 | 5.12 (dd, 9.0, 5.5)                                |                                         |                                                    |
| 2                |                                         |                                                    |                                         |                                                    |                                         |                                                    | 161.0 C                                 |                                                    |
| 3                | 153.7 CH                                | 7.57 d (2.5)                                       | 146.9 CH                                | 7.22 (d, 2.5)                                      | 151.0 CH                                | 7.33 (d, 1.0)                                      | 113.8 CH                                | 6.33 (d, 9.5)                                      |
| 4                | 103.6 C                                 |                                                    | 107.2 C                                 |                                                    | 113.0 C                                 |                                                    | 144.7 CH                                | 7.97 (d, 9.5)                                      |
| 5                | 23.9 CH <sub>2</sub>                    | 3.22 (m)                                           | 24.1 CH                                 | 2.94 (m)                                           | 31.9 CH                                 | 2.96 (m)                                           | 110.2 CH                                | 7.30 (s)                                           |
| 6                | 28.3 CH <sub>2</sub>                    | 1.92 (m)                                           | 30.8 CH <sub>2</sub>                    | 2.10 (dt, 12.0, 4.0)<br>1.08 (m)                   | 40.0 CH <sub>2</sub>                    | 2.16 (m),<br>1.68 (ddd, 13.7, 8.5, 4.0)            | 146.5 C                                 |                                                    |
| 7                | 92.3 CH                                 | 6.76 (td, 7.5, 1.5)                                | 86.7 CH                                 | 4.93 (dd, 9.5, 4.0)                                | 77.8 CH                                 | 5.12 (dd, 9.0, 5.5)                                | 150.4 C                                 |                                                    |
| 8                | 132.5 CH                                | 5.46 (m)                                           | 133.1 CH                                | 5.43 (m)                                           | 40.0 CH                                 | 2.04 (m)                                           | 103.5 CH                                | 7.16 (s)                                           |
| 9                | 41.4 CH                                 | 2.69 (m)                                           | 42.8 CH <sub>2</sub>                    | 2.62 (ddd, 8.0, 4.0, 2.0)                          | 45.7 CH                                 | 1.89 (m)                                           | 149.4 C                                 |                                                    |
| 10               | 121.3 CH <sub>2</sub>                   | 5.27 (m)                                           | 120.7 CH <sub>2</sub>                   | 5.26 (dd, 17.0, 2.5),<br>5.19 (dd, 10.0, 2.5)      | 14.0 CH <sub>3</sub>                    | 0.96 (d, 7.0)                                      | 112.8 C                                 |                                                    |
| 11               | 163.3 C                                 |                                                    | 160.9 C                                 |                                                    | 168.5 C                                 |                                                    |                                         |                                                    |
| 1'               | 99.1 CH                                 | 4.51 d (8.0)                                       | 98.8 CH                                 | 4.47 (d, 8.0)                                      | 99.2 CH                                 | 4.47 (d, 8.0)                                      | 100.1 CH                                | 5.08 (d, 7.0)                                      |
| 2'               | 77.2 CH                                 | 3.00 (m)                                           | 77.1 CH                                 | 3.10 (m)                                           | 77.2 CH                                 | 3.10 (m)                                           | 77.6 CH                                 | 3.30 (m)                                           |
| 3'               | 71.9 CH                                 | 2.95 (m)                                           | 73.4 CH                                 | 3.10 (m)                                           | 73.7 CH                                 | 2.93 (m)                                           | 73.5 CH                                 | 3.30 (m)                                           |
| 4'               | 70.5 CH                                 | 3.15 (m)                                           | 70.4 CH                                 | 3.10 (m)                                           | 70.6 CH                                 | 2.96 (m)                                           | 70.1 CH                                 | 3.30 (m)                                           |
| 5'               | 73.6 CH                                 | 3.12 (m)                                           | 77.0 CH                                 | 3.10 (m)                                           | 76.7 CH                                 | 3.10 (m)                                           | 77.2 CH                                 | 3.30 (m)                                           |
| 6'               | 61.5 CH <sub>2</sub>                    | 3.65 (ddd, 12.0, 6.5, 2.0),<br>3.39 (m)            | 61.4 CH <sub>2</sub>                    | 3.64 (dd, 10.5, 5.0)                               | 61.7 CH <sub>2</sub>                    | 3.64 (d, 12.0),<br>3.40 (overlap)                  | 61.1 CH <sub>2</sub>                    | 3.44 (d, 8.0)                                      |
| OCH <sub>3</sub> |                                         |                                                    |                                         |                                                    |                                         |                                                    | 56.5 CH <sub>3</sub>                    | 3.82 (s)                                           |
| 1''              | 165.6 C                                 |                                                    | 171.6 C                                 |                                                    | 125.6 C                                 |                                                    |                                         |                                                    |
| 2''              | 126.6 C                                 |                                                    | 64.1 CH                                 | 3.78 (d, 7.5)                                      | 130.9 CH                                | 7.53 (d, 9.0)                                      |                                         |                                                    |
| 3''              | 145.8 CH                                | 6.51 (t, 2.4)                                      | 77.7 CH                                 | 3.94 (m)                                           | 116.2 CH                                | 6.74 (d, 9.0)                                      |                                         |                                                    |
| 4''              | 21.9 CH                                 | 2.12 (ddp, 23.7, 15.0, 8.0)                        | 19.6 CH <sub>3</sub>                    | 1.30 d (6.0)                                       | 160.3 C                                 |                                                    |                                         |                                                    |
| 5''              | 40.7 CH                                 | 1.47 (ddd, 10.5, 6.0, 4.0)                         |                                         |                                                    | 116.2 CH                                | 6.74 (d, 9.0)                                      |                                         |                                                    |
| 6''              | 71.9 CH                                 |                                                    |                                         |                                                    | 130.9 CH                                | 7.53 (d, 9.0)                                      |                                         |                                                    |
| 7''              | 146.2 CH <sub>2</sub>                   | 5.83 (dd, 17.0, 10.5)                              |                                         |                                                    | 145.2 CH                                | 6.36 (d, 16.0)                                     |                                         |                                                    |
| 8''              | 111.8 CH <sub>2</sub>                   | 5.12 (dd, 17.0, 2.0),<br>4.93 (m)                  |                                         |                                                    | 114.9 CH                                | 7.53 (d, 16.0)                                     |                                         |                                                    |
| 9''              | 12.5 CH <sub>3</sub>                    | 1.73 (s)                                           |                                         |                                                    | 166.8 C                                 |                                                    |                                         |                                                    |

<sup>a</sup>Measured at 400 MHz in DMSO-*d*<sub>6</sub>. <sup>b</sup> Measured at 500 MHz in DMSO-*d*<sub>6</sub>. <sup>c</sup> Measured at 100 MHz in DMSO-*d*<sub>6</sub>. <sup>d</sup> Measured at 125 MHz in DMSO-*d*<sub>6</sub>.

Figure S1.  $^1\text{H}$  NMR spectrum of **1** in DMSO- $d_6$  (400 MHz)

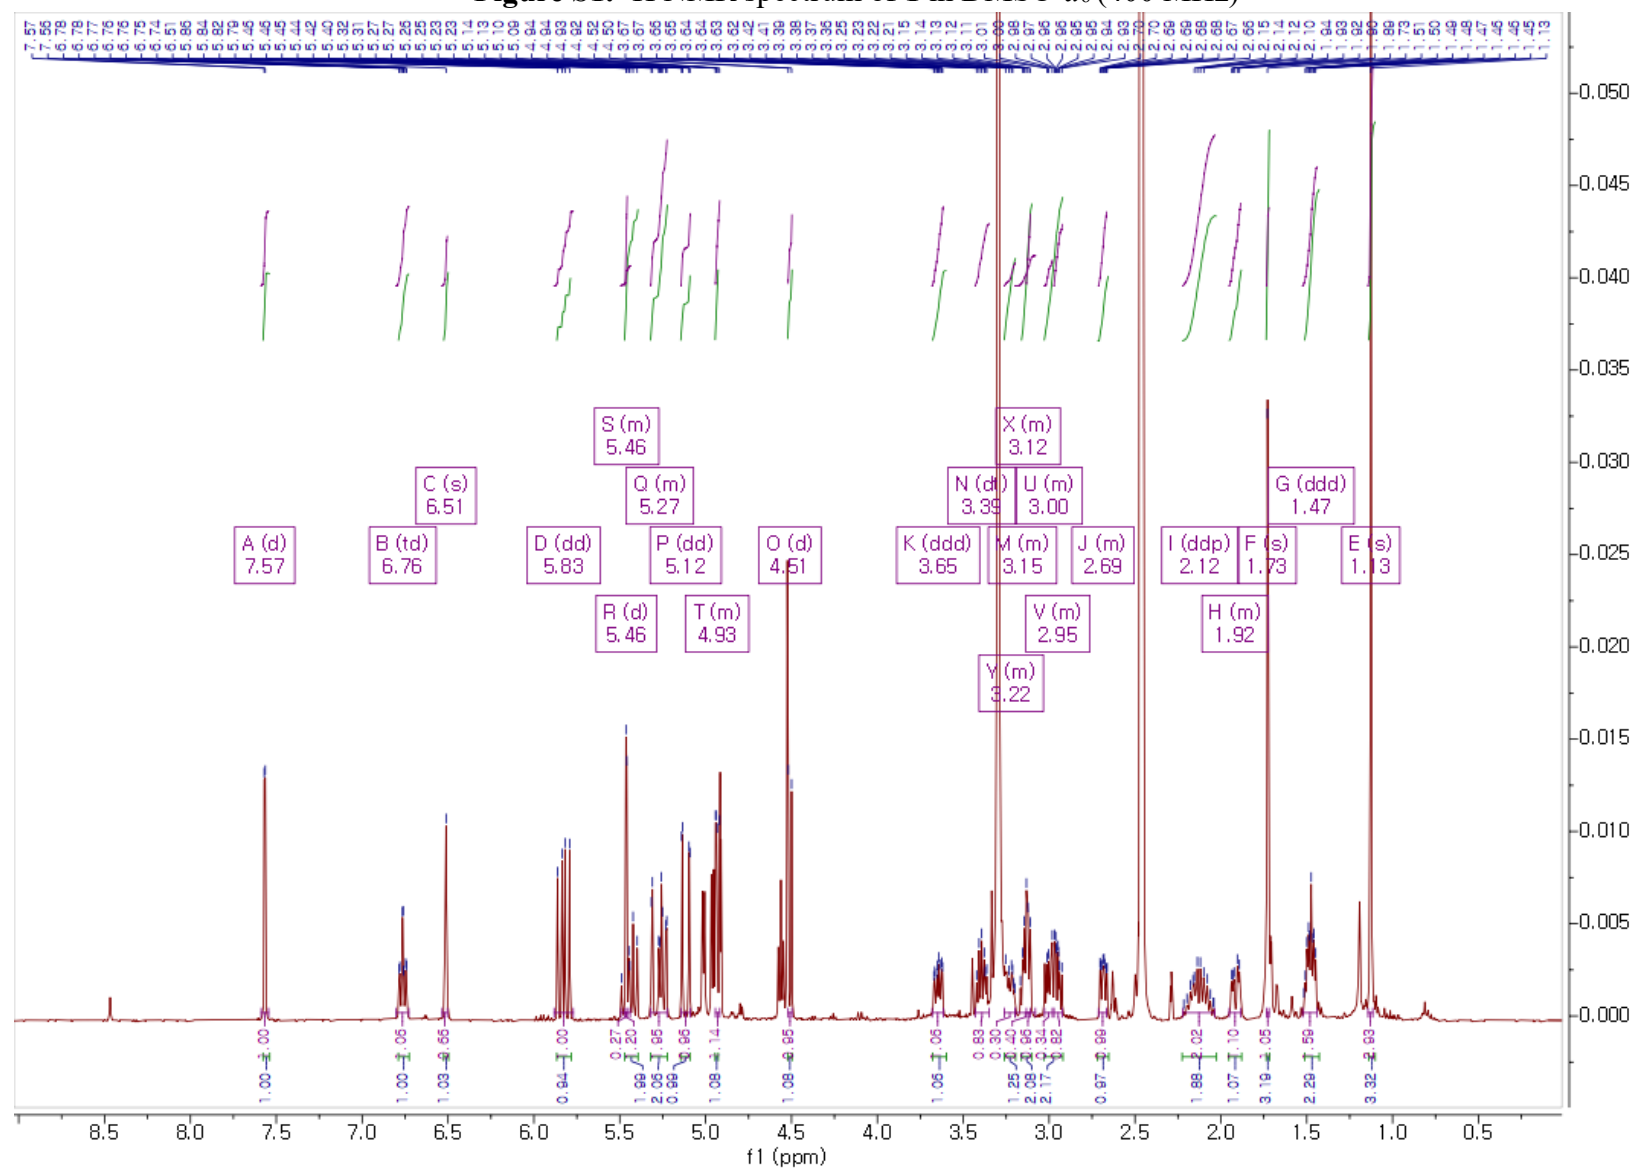

Figure S2.  $^1\text{H}$  NMR spectrum of **2** in  $\text{DMSO}-d_6$  (400 MHz)

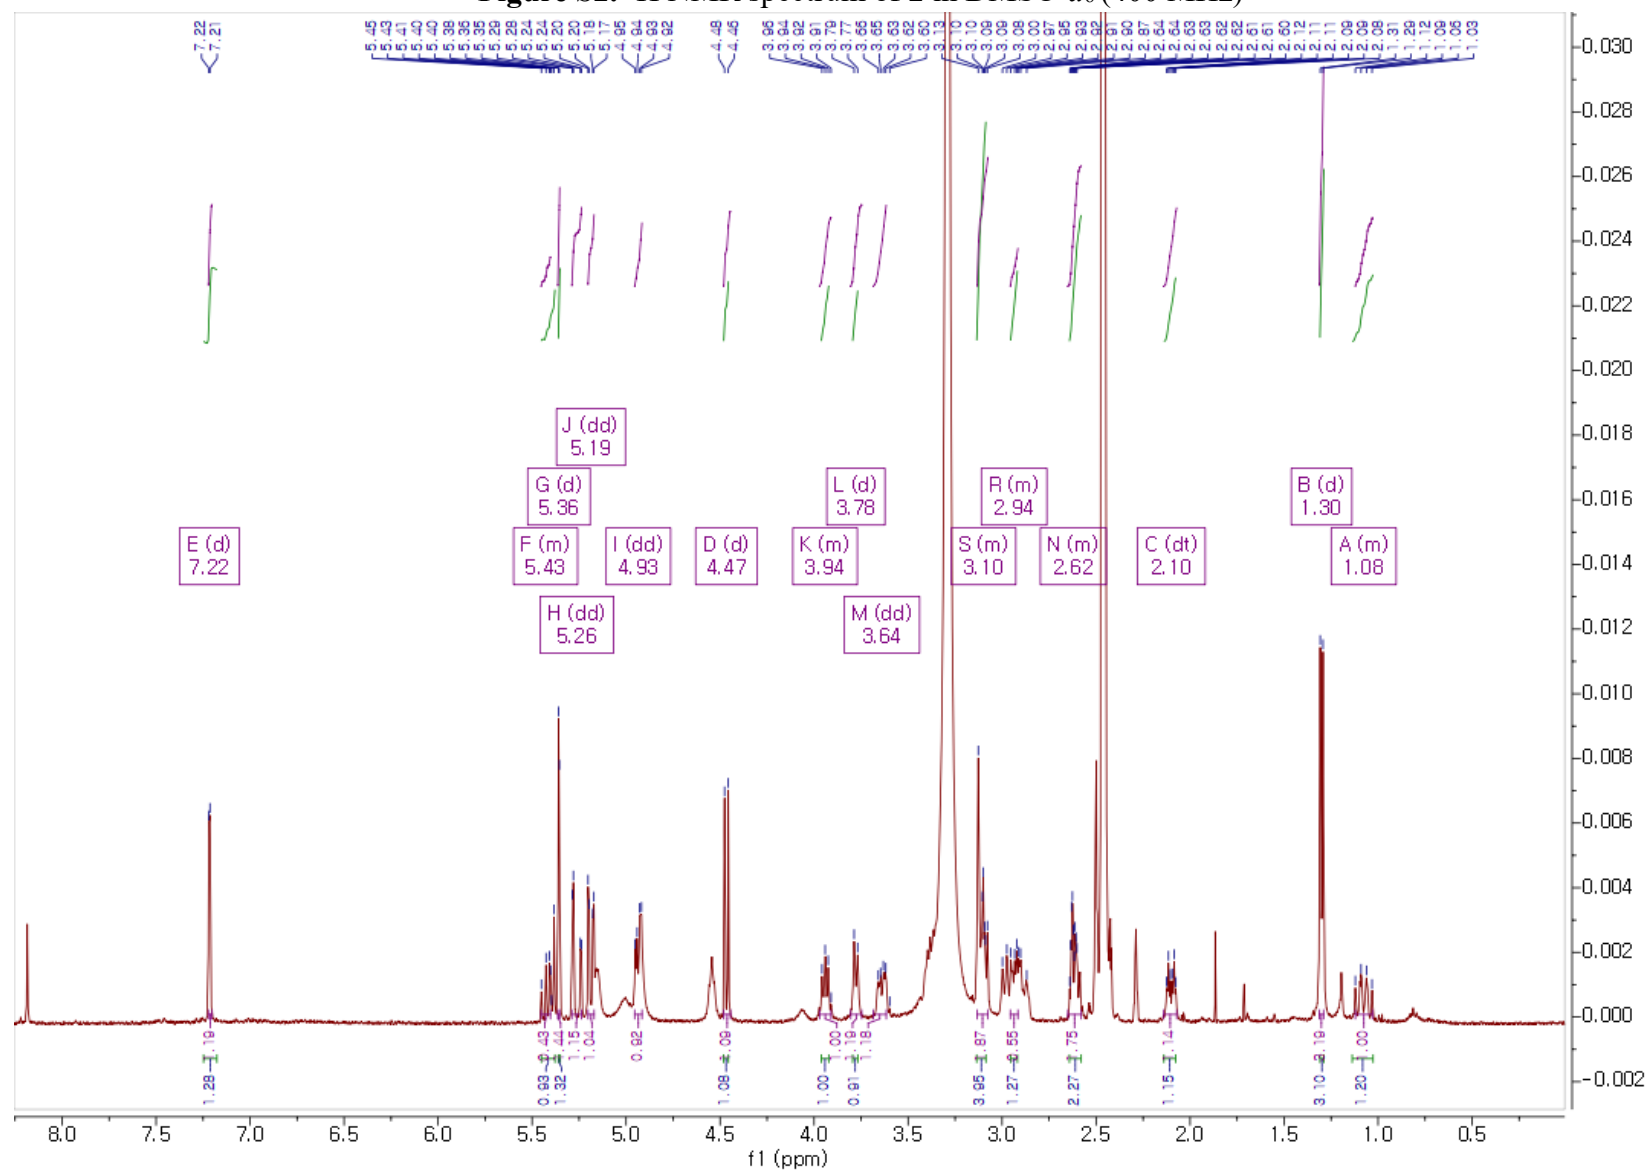

Figure S3.  $^1\text{H}$  NMR spectrum of **3** in  $\text{DMSO}-d_6$  (400 MHz)

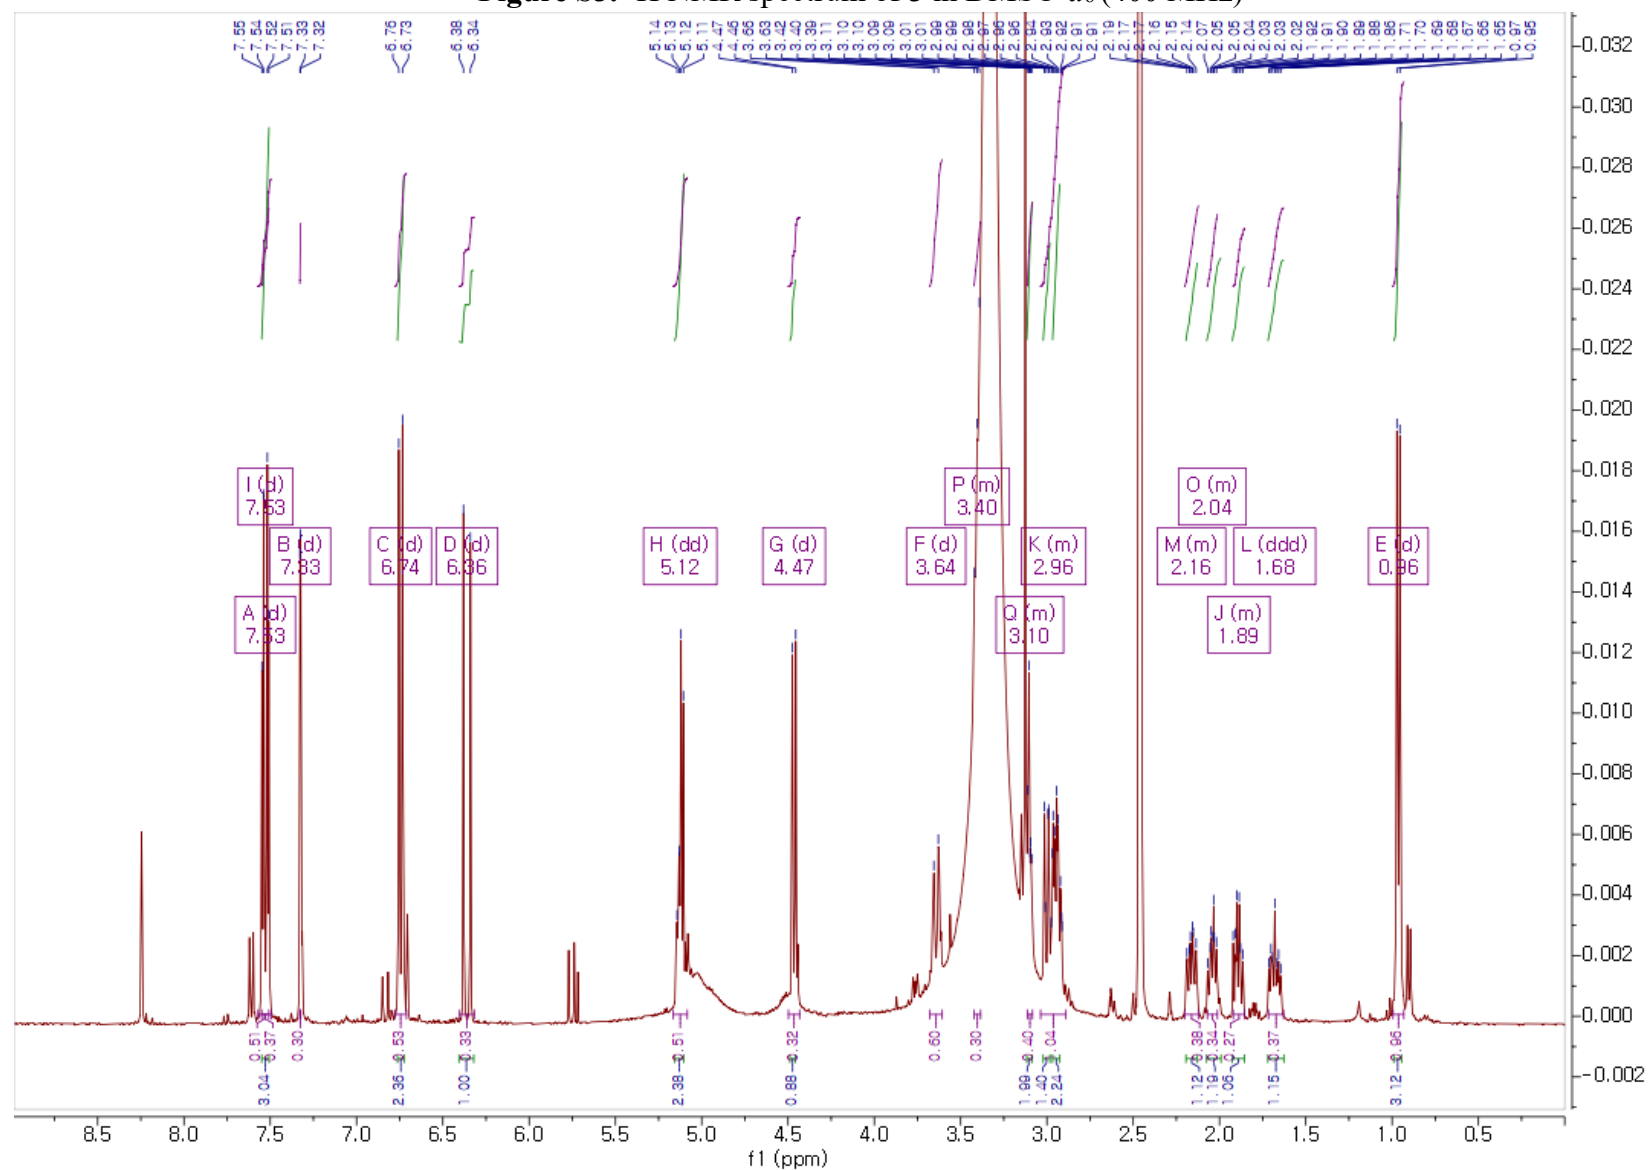

Figure S4.  $^1\text{H}$  NMR spectrum of **4** in  $\text{DMSO}-d_6$  (500 MHz)

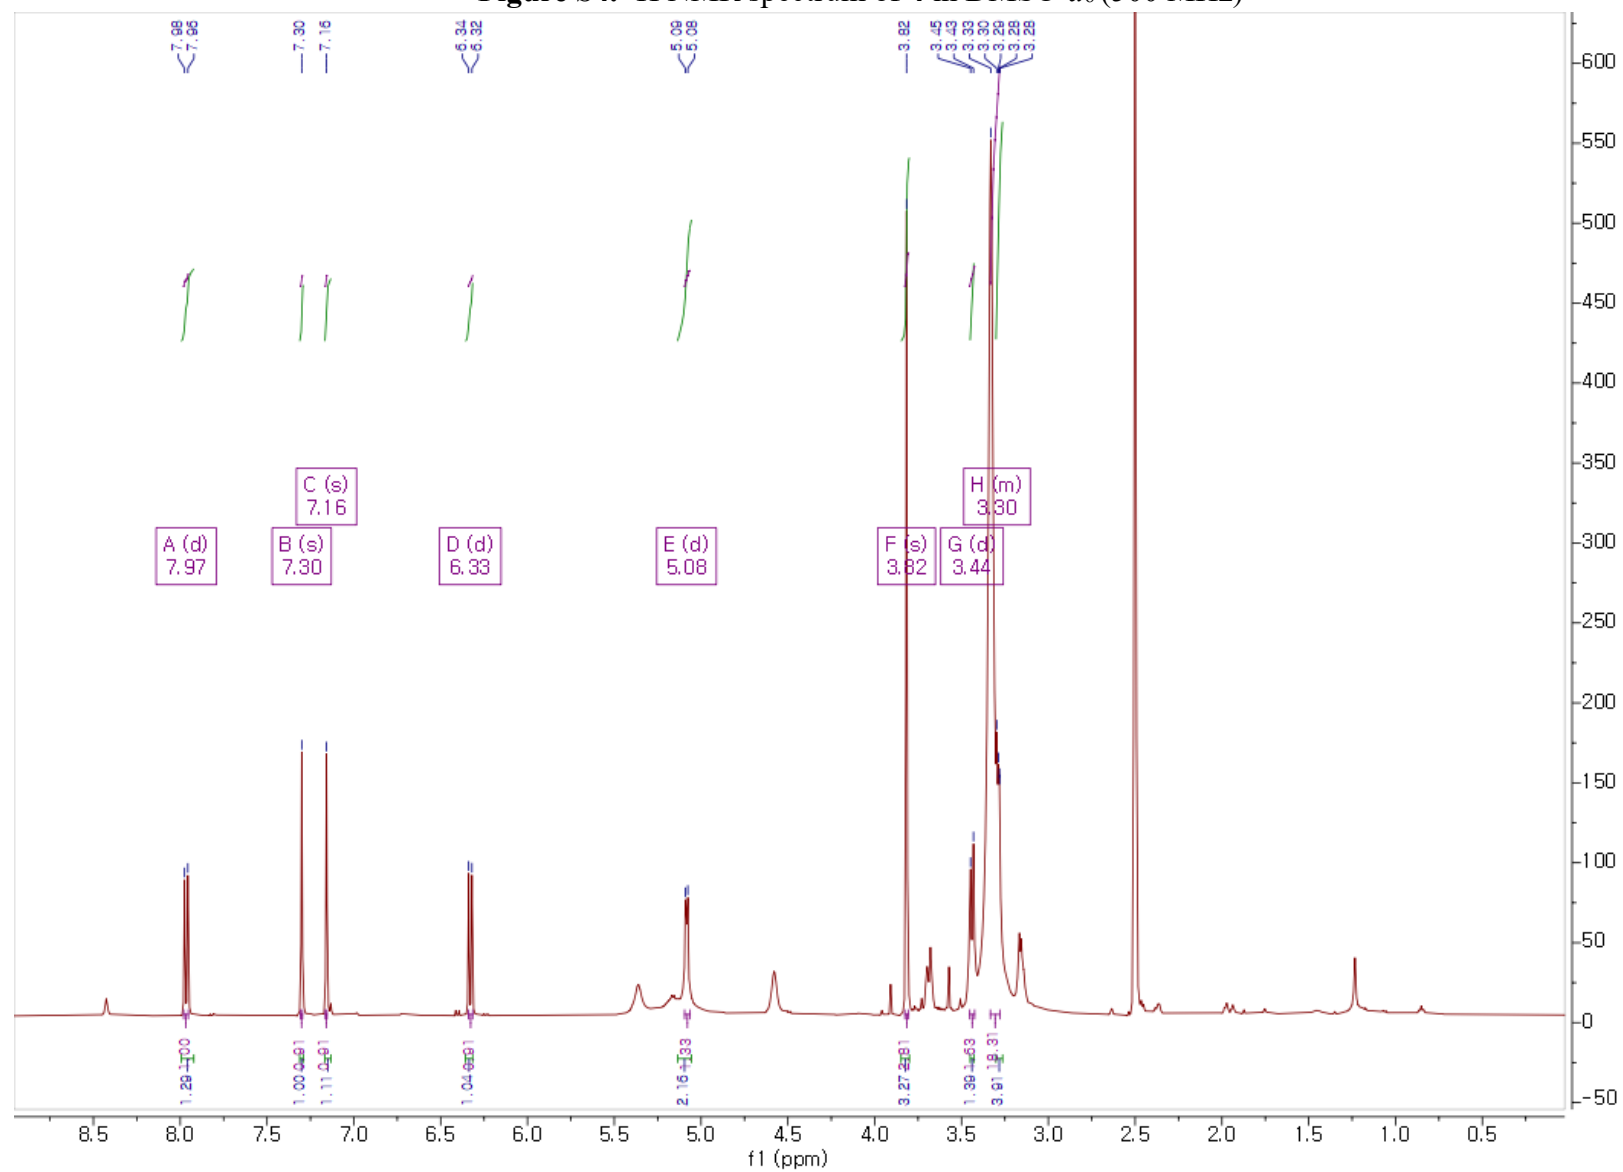

Figure S5. HR-ESI-MS data of 5

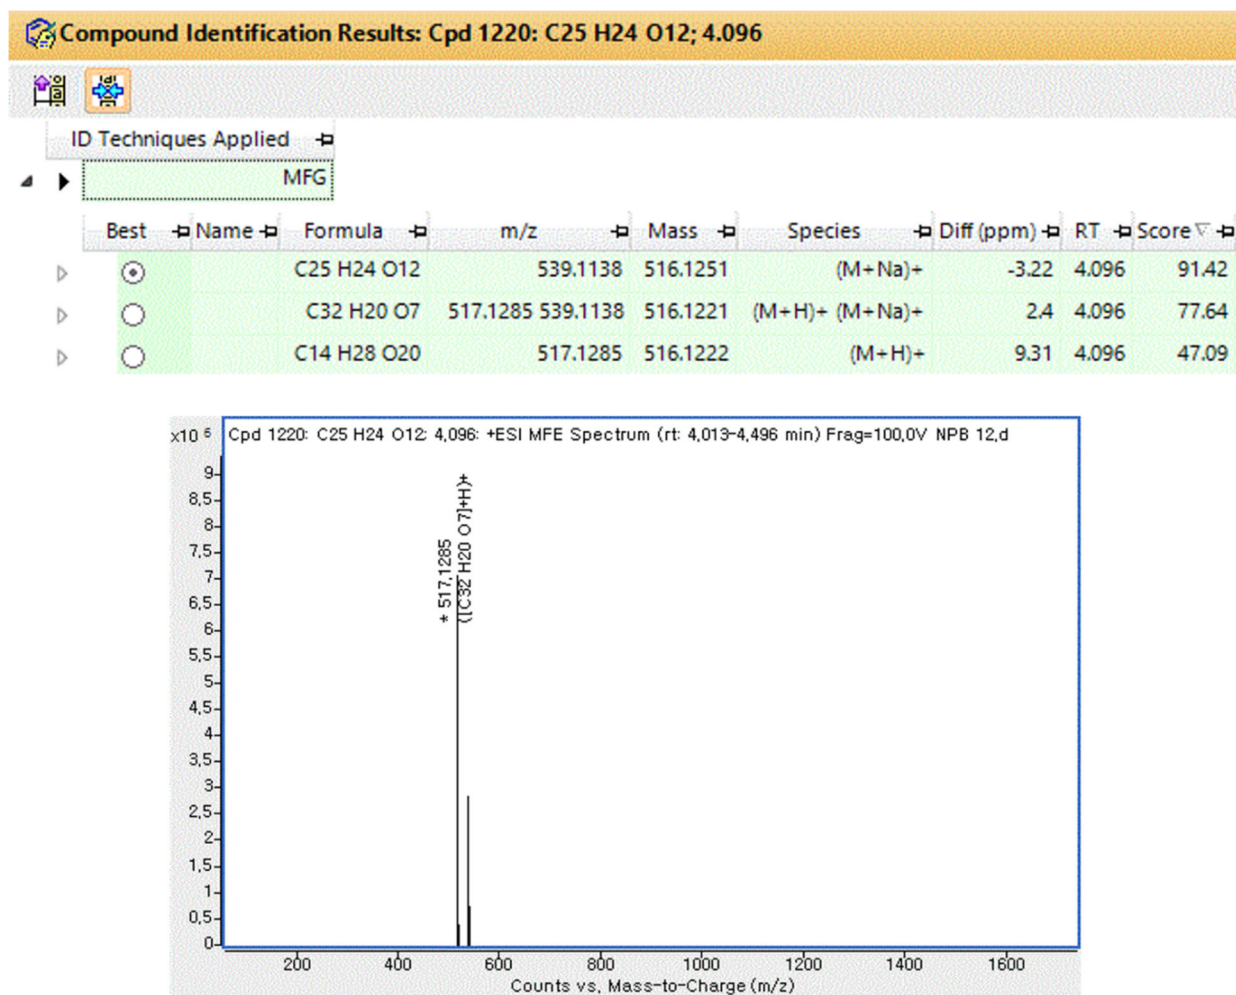

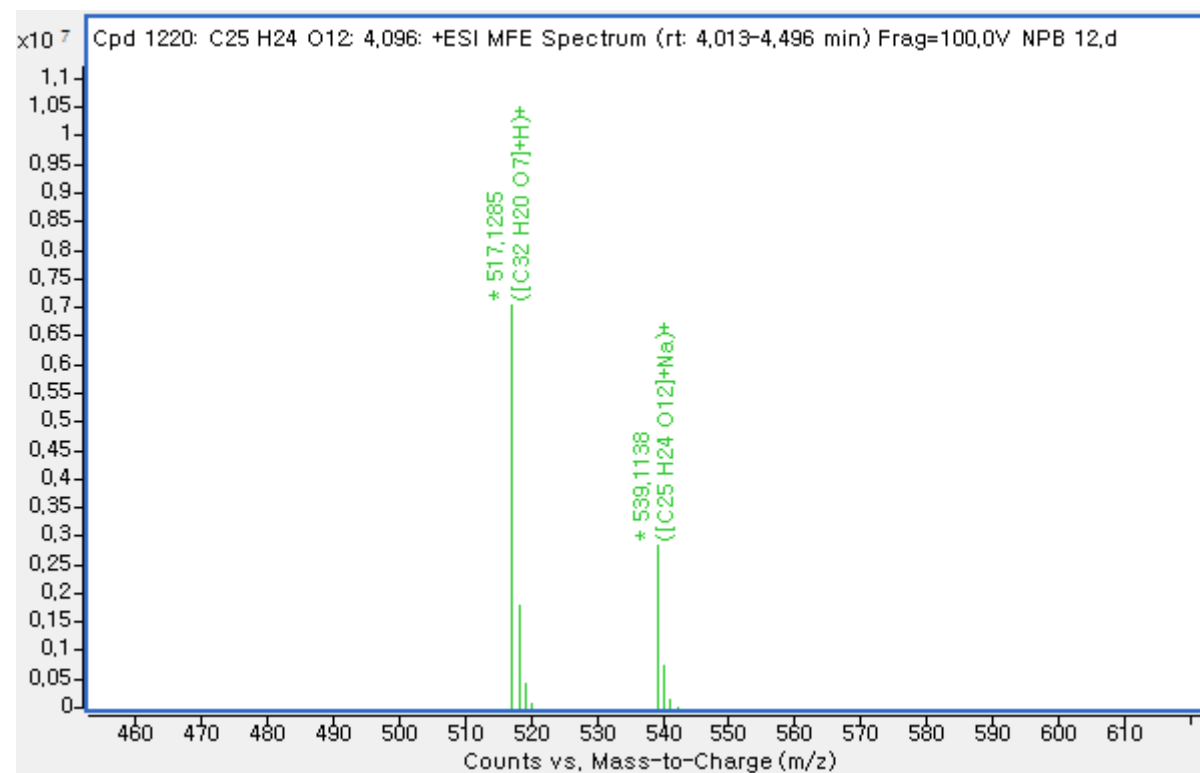

**Figure S6.**  $^1\text{H}$  NMR spectrum of **5** in  $\text{DMSO}-d_6$  (400 MHz)

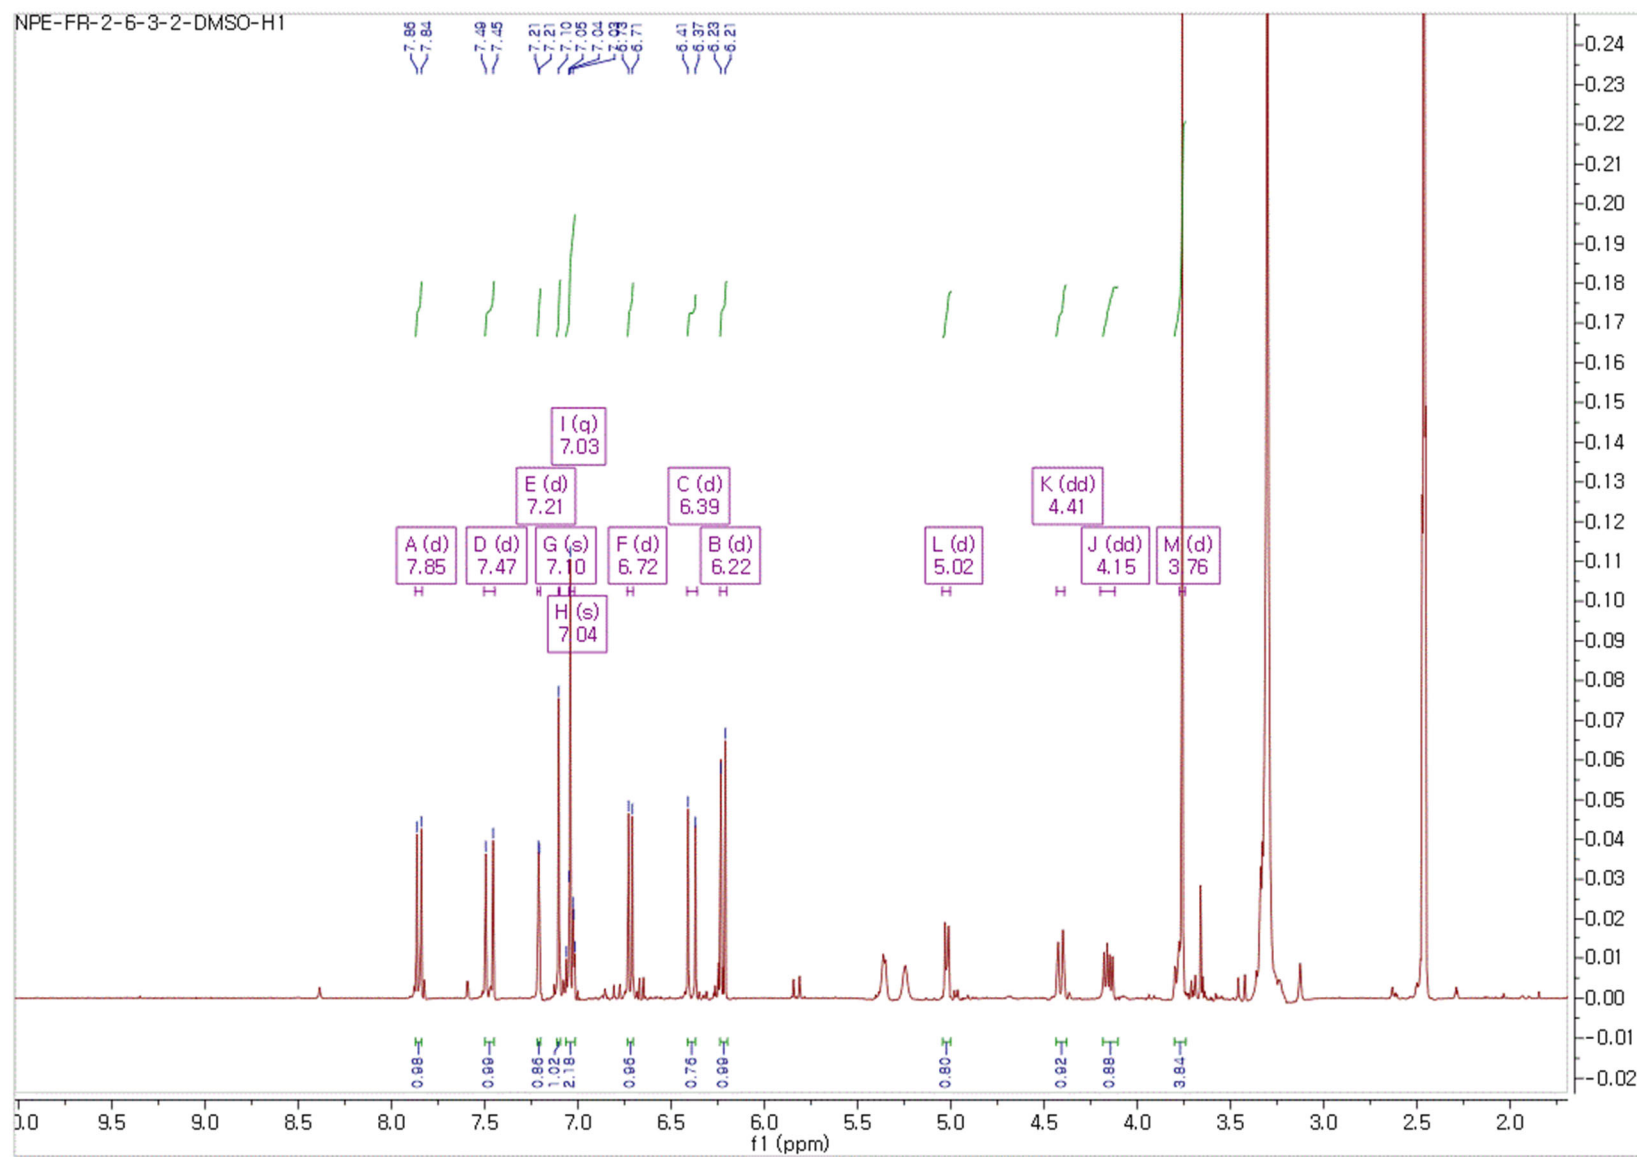

**Figure S7.**  $^{13}\text{C}$  NMR spectrum of **5** in  $\text{DMSO-}d_6$  (100 MHz)

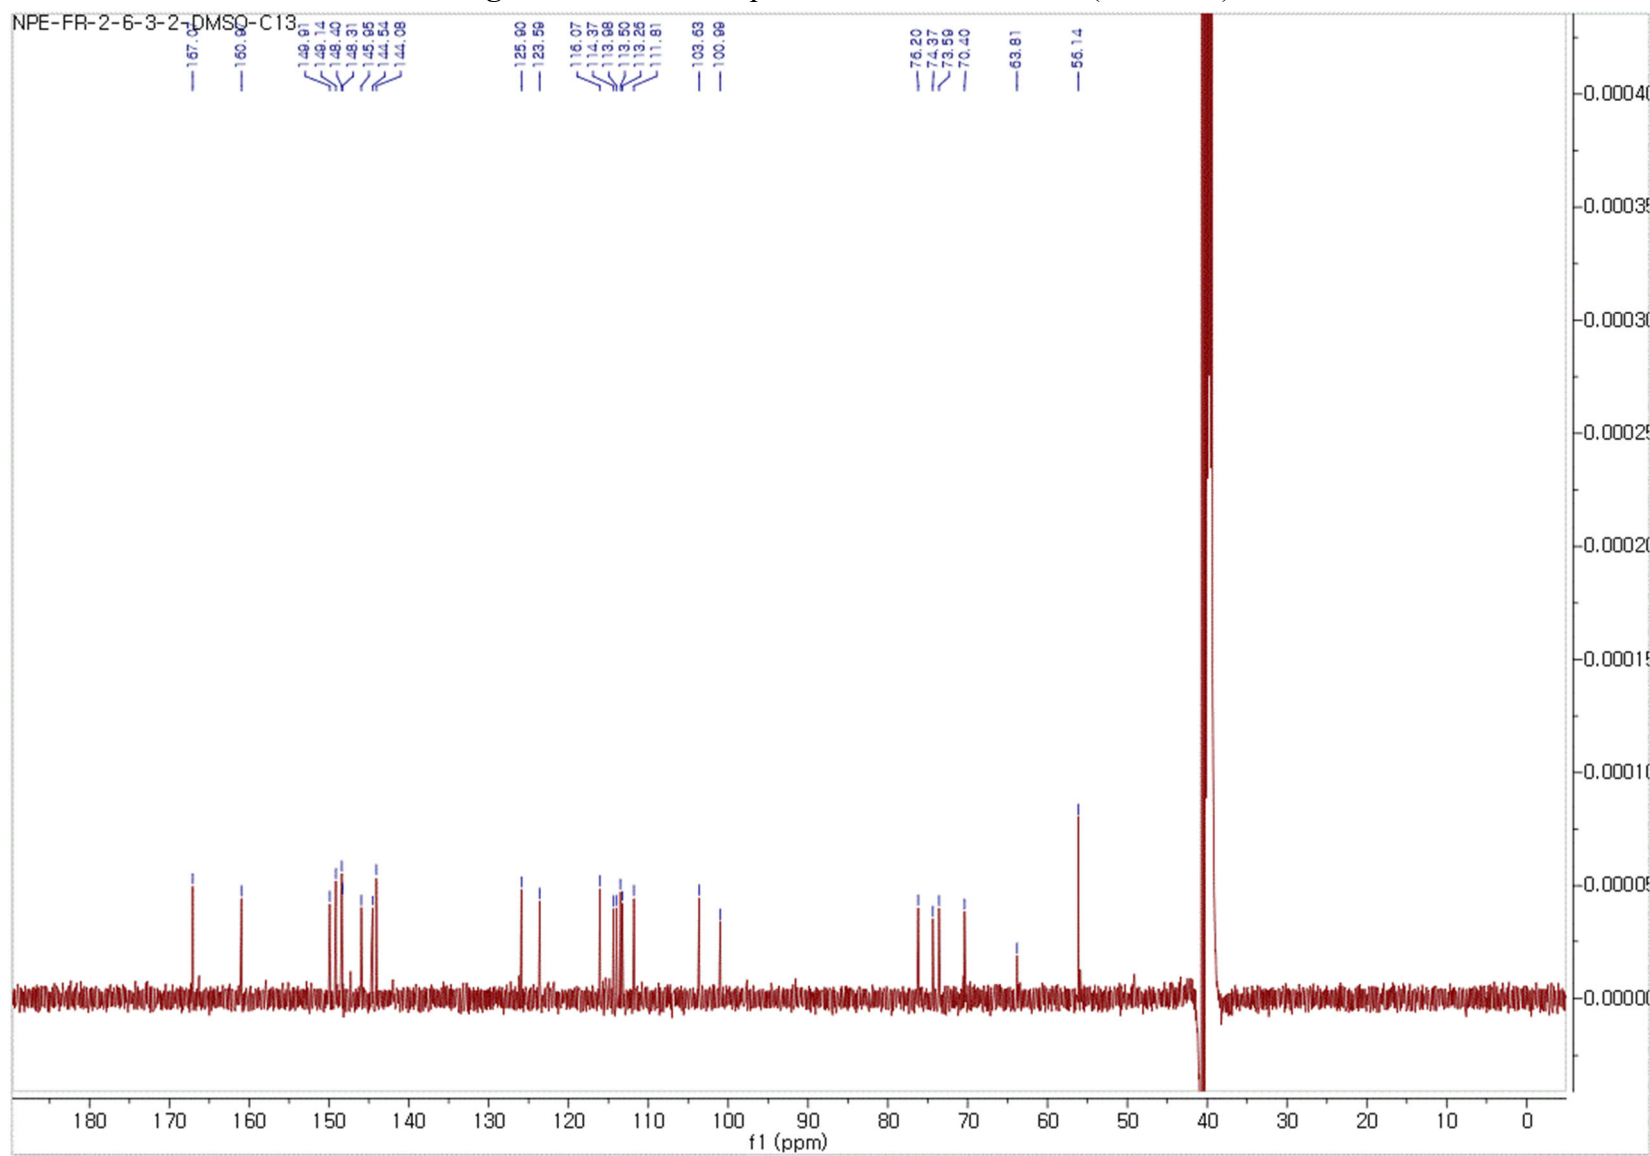

**Figure S8.**  $^1\text{H}$ - $^1\text{H}$  COSY spectrum of **5** in  $\text{DMSO}-d_6$

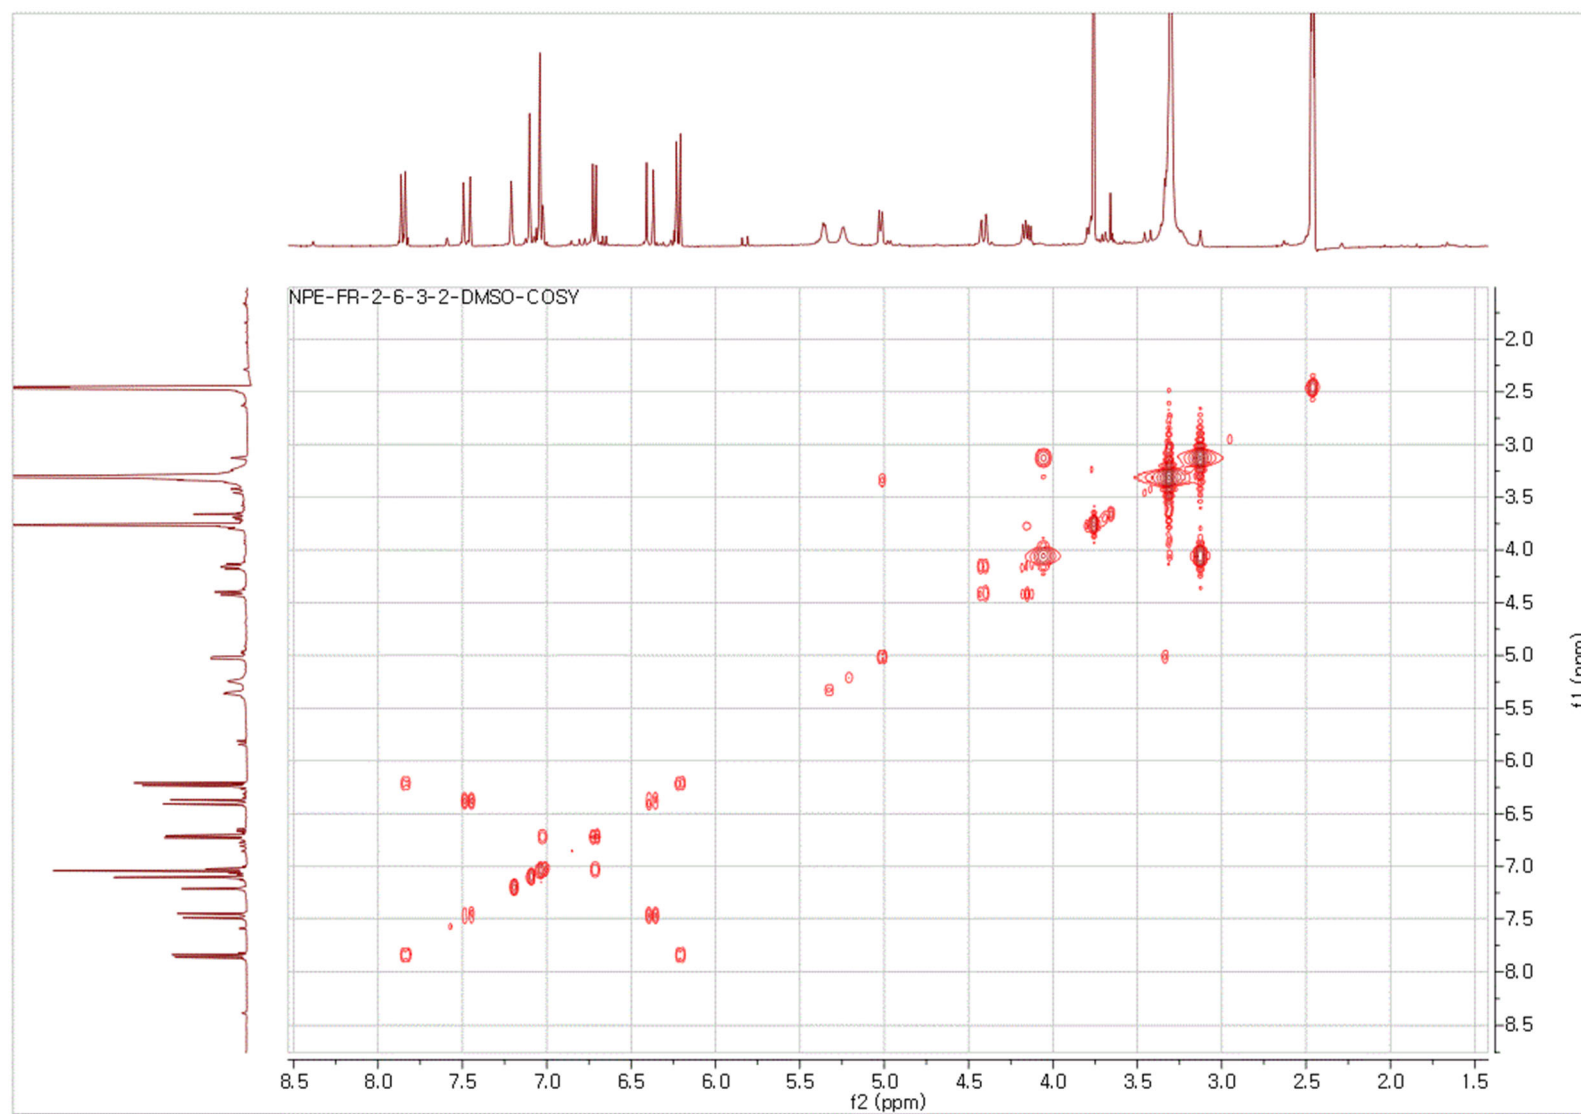

**Figure S9.** HSQC spectrum of **5** in DMSO-*d*<sub>6</sub>

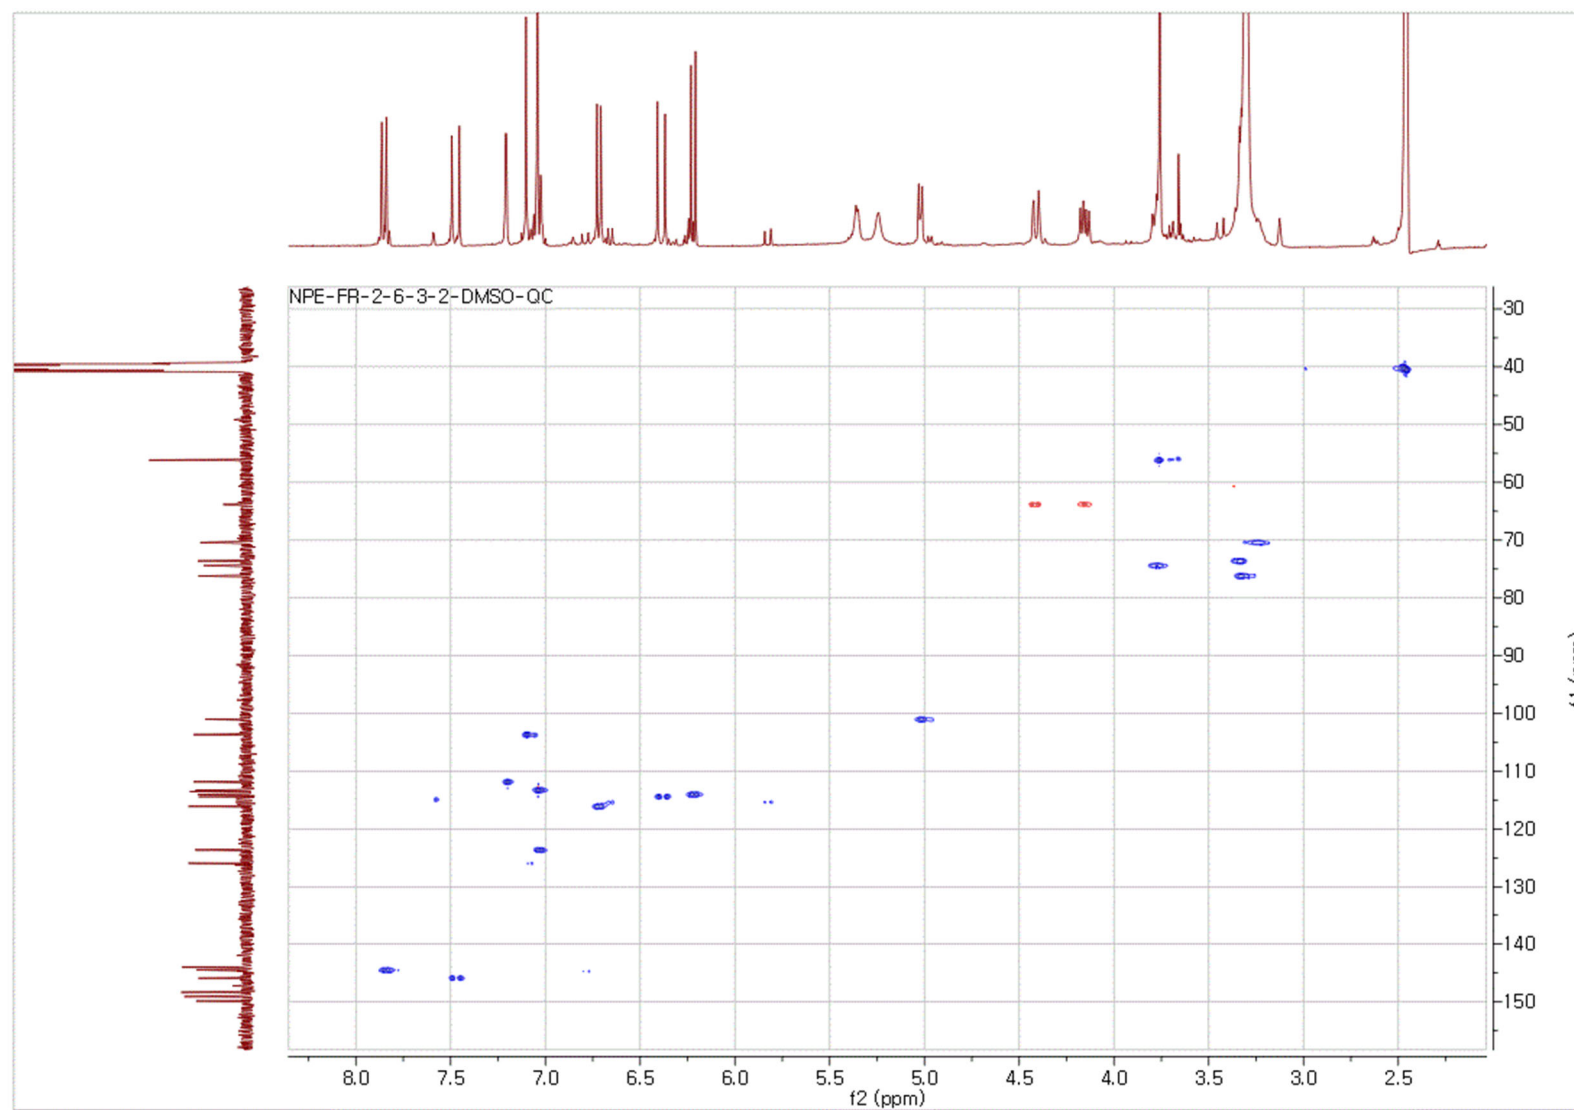

**Figure S10.** HMBC spectrum of **5** in DMSO-*d*<sub>6</sub>

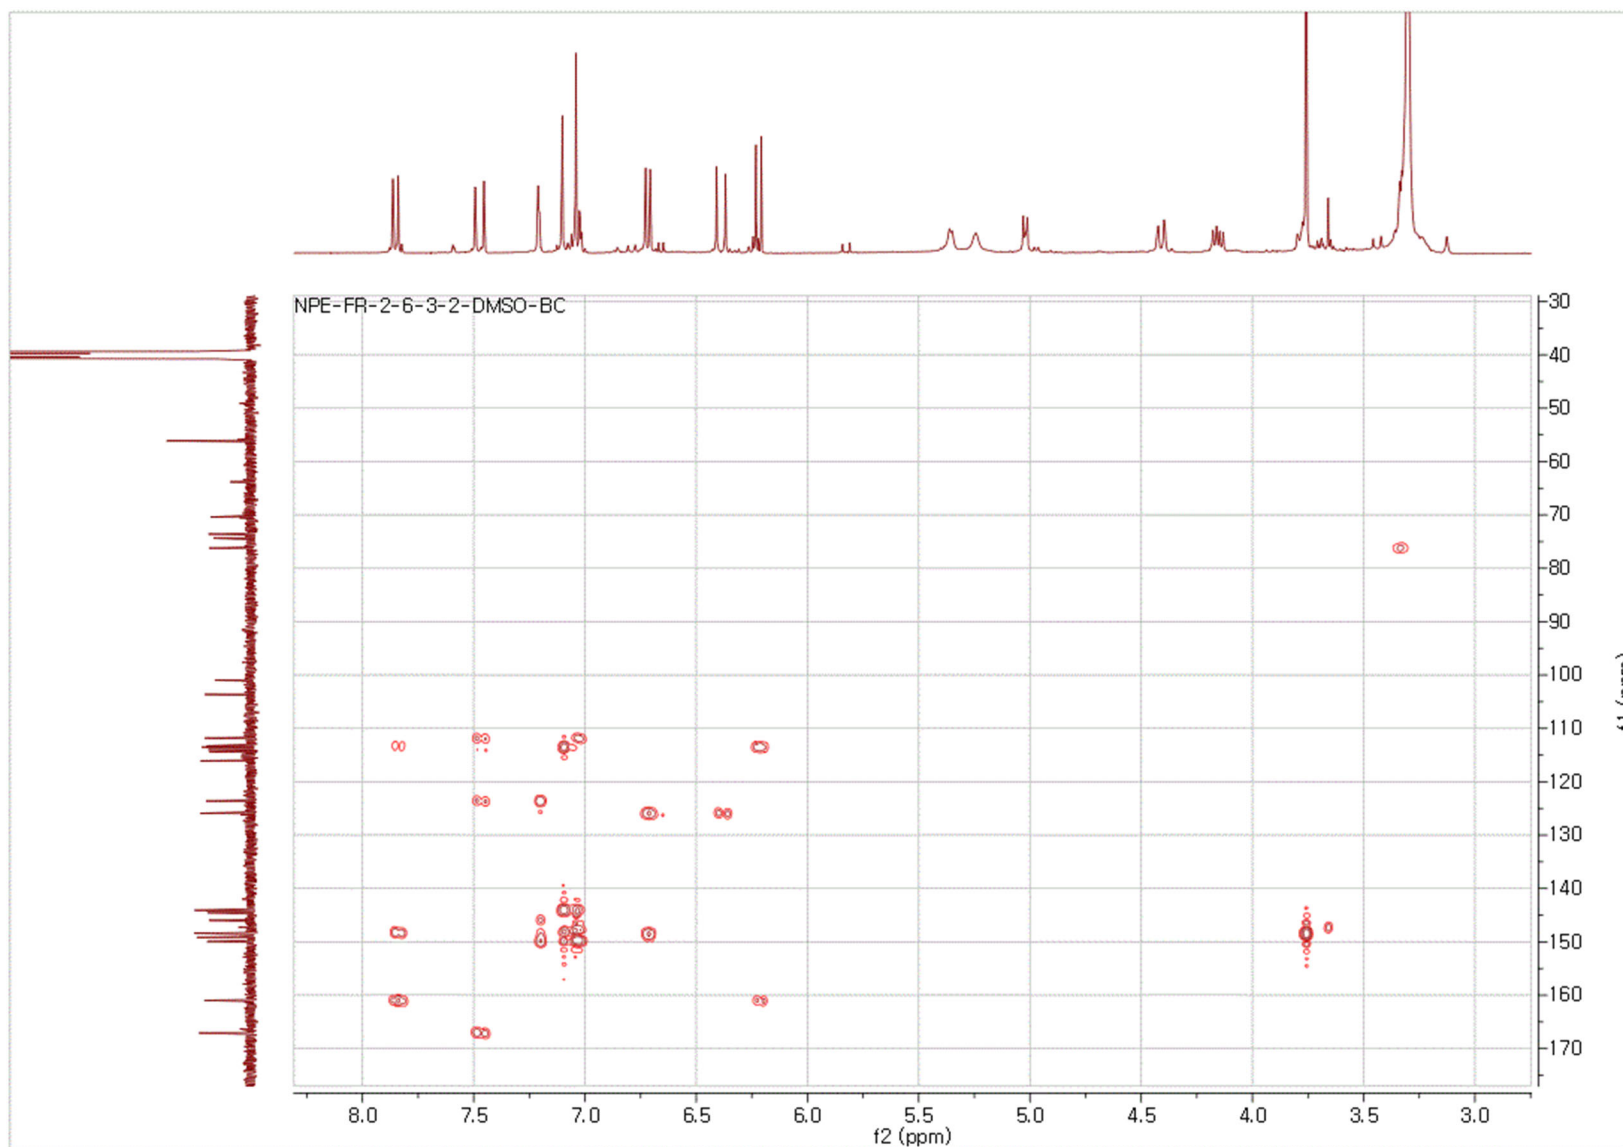

**Figure S11.** UV/PDA spectrum of **5**

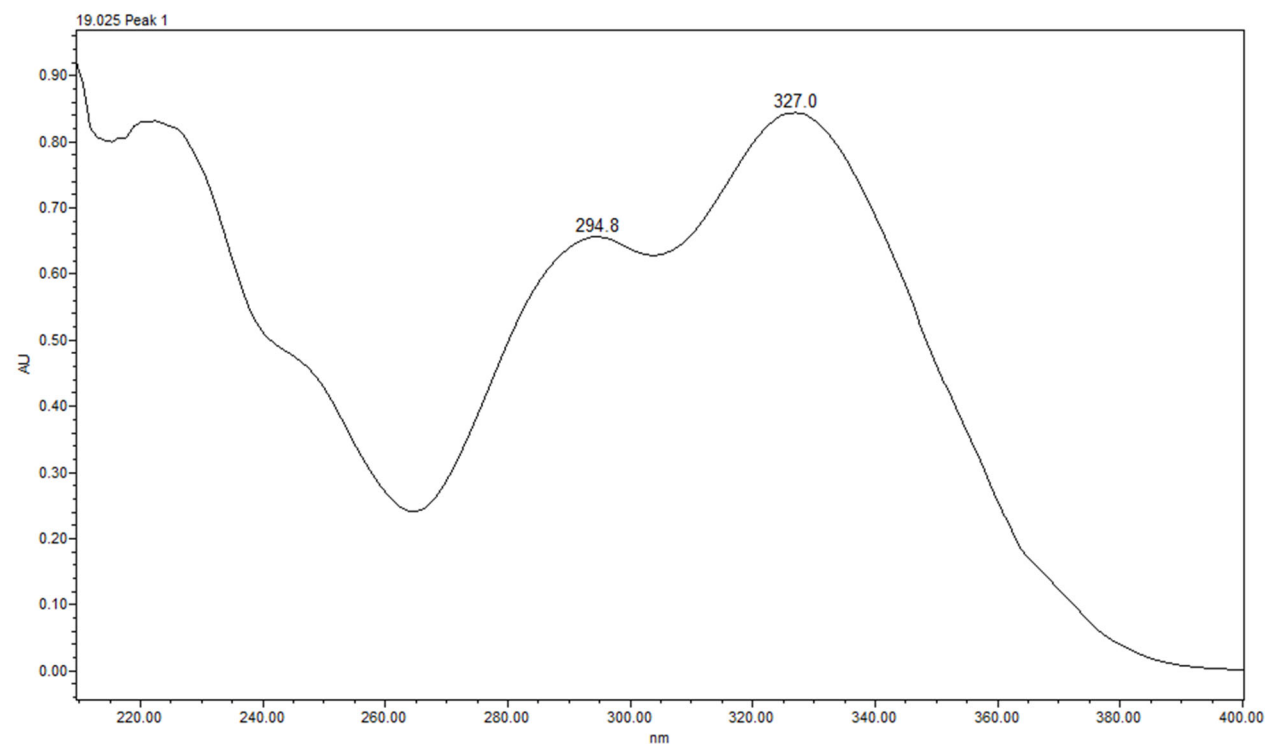

**Figure S12.** HR-ESI-MS data of **6**

Compound Identification Results: Cpd 833: C<sub>26</sub> H<sub>26</sub> O<sub>12</sub>; 4.214

ID Techniques Applied

MFG

| Best | Name | Formula                                         | m/z                                            | Mass    | Species                                                                                                           | Diff (ppm) | RT    | Score |
|------|------|-------------------------------------------------|------------------------------------------------|---------|-------------------------------------------------------------------------------------------------------------------|------------|-------|-------|
| ⊕    |      | C <sub>26</sub> H <sub>26</sub> O <sub>12</sub> | 531.1504 548.1770 553.1324 1061.2918 1083.2751 | 530.142 | (M+H) <sup>+</sup> (M+NH <sub>4</sub> ) <sup>+</sup> (M+Na) <sup>+</sup> (2M+H) <sup>+</sup> (2M+Na) <sup>+</sup> | -0.8       | 4.214 | 99.37 |

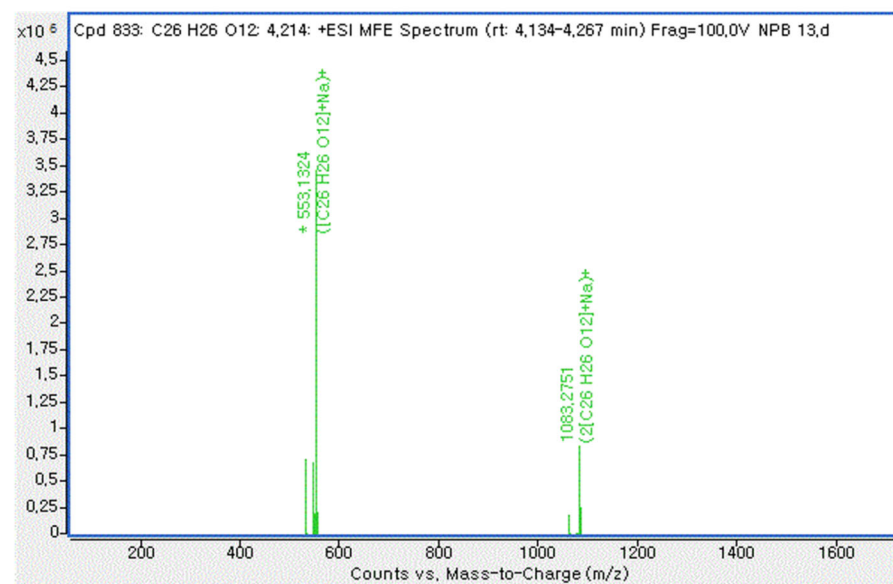

**Figure S13.**  $^1\text{H}$  NMR spectrum of **6** in  $\text{DMSO}-d_6$  (400 MHz)

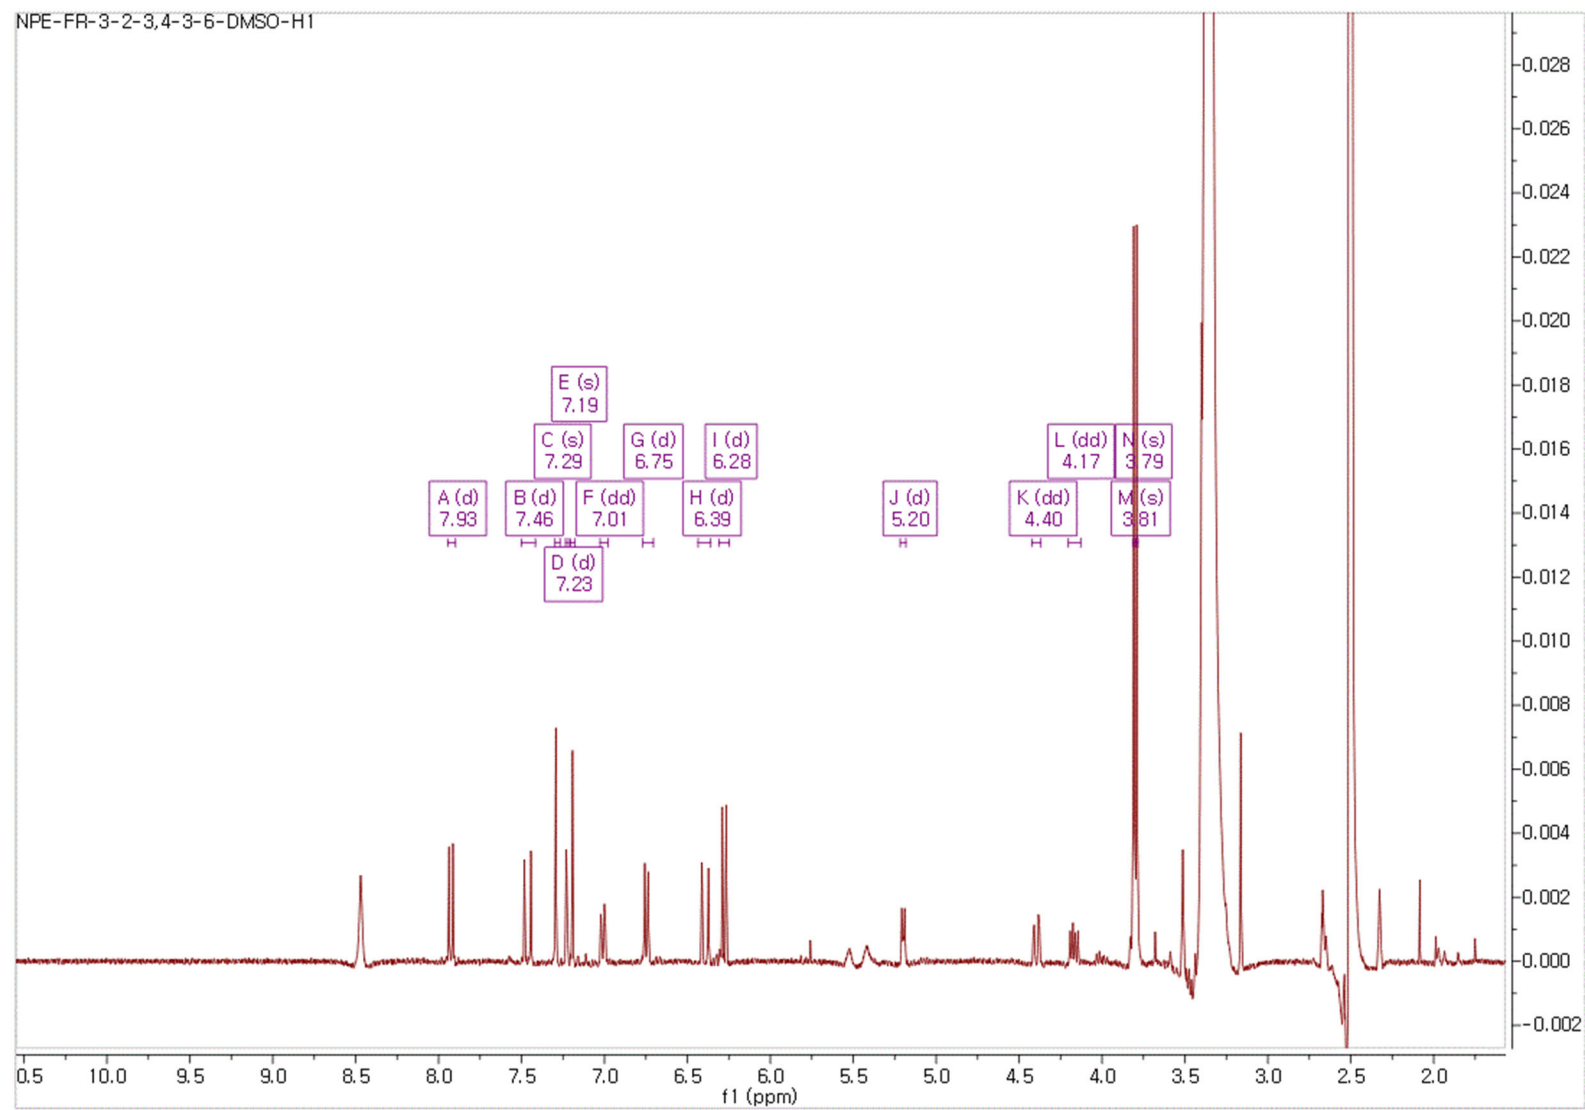

**Figure S14.**  $^{13}\text{C}$  NMR spectrum of **6** in  $\text{DMSO-}d_6$  (125 MHz)

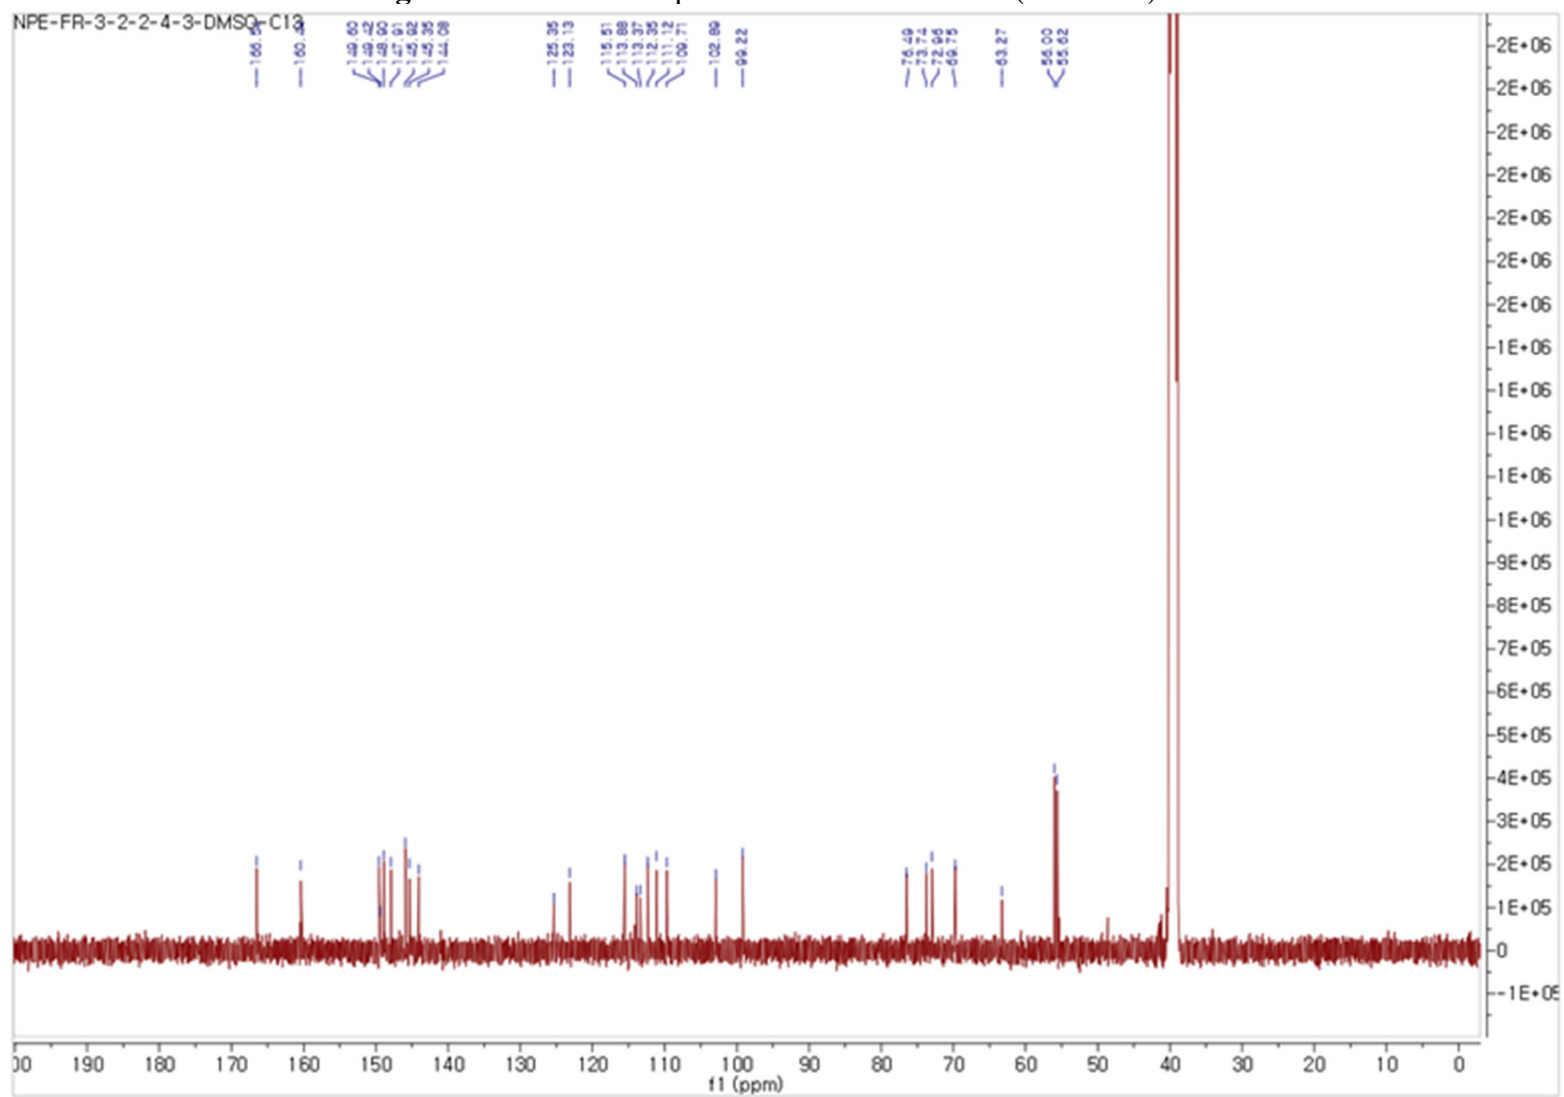

**Figure S15.**  $^1\text{H}$ - $^1\text{H}$  COSY spectrum of **6** in  $\text{DMSO}-d_6$

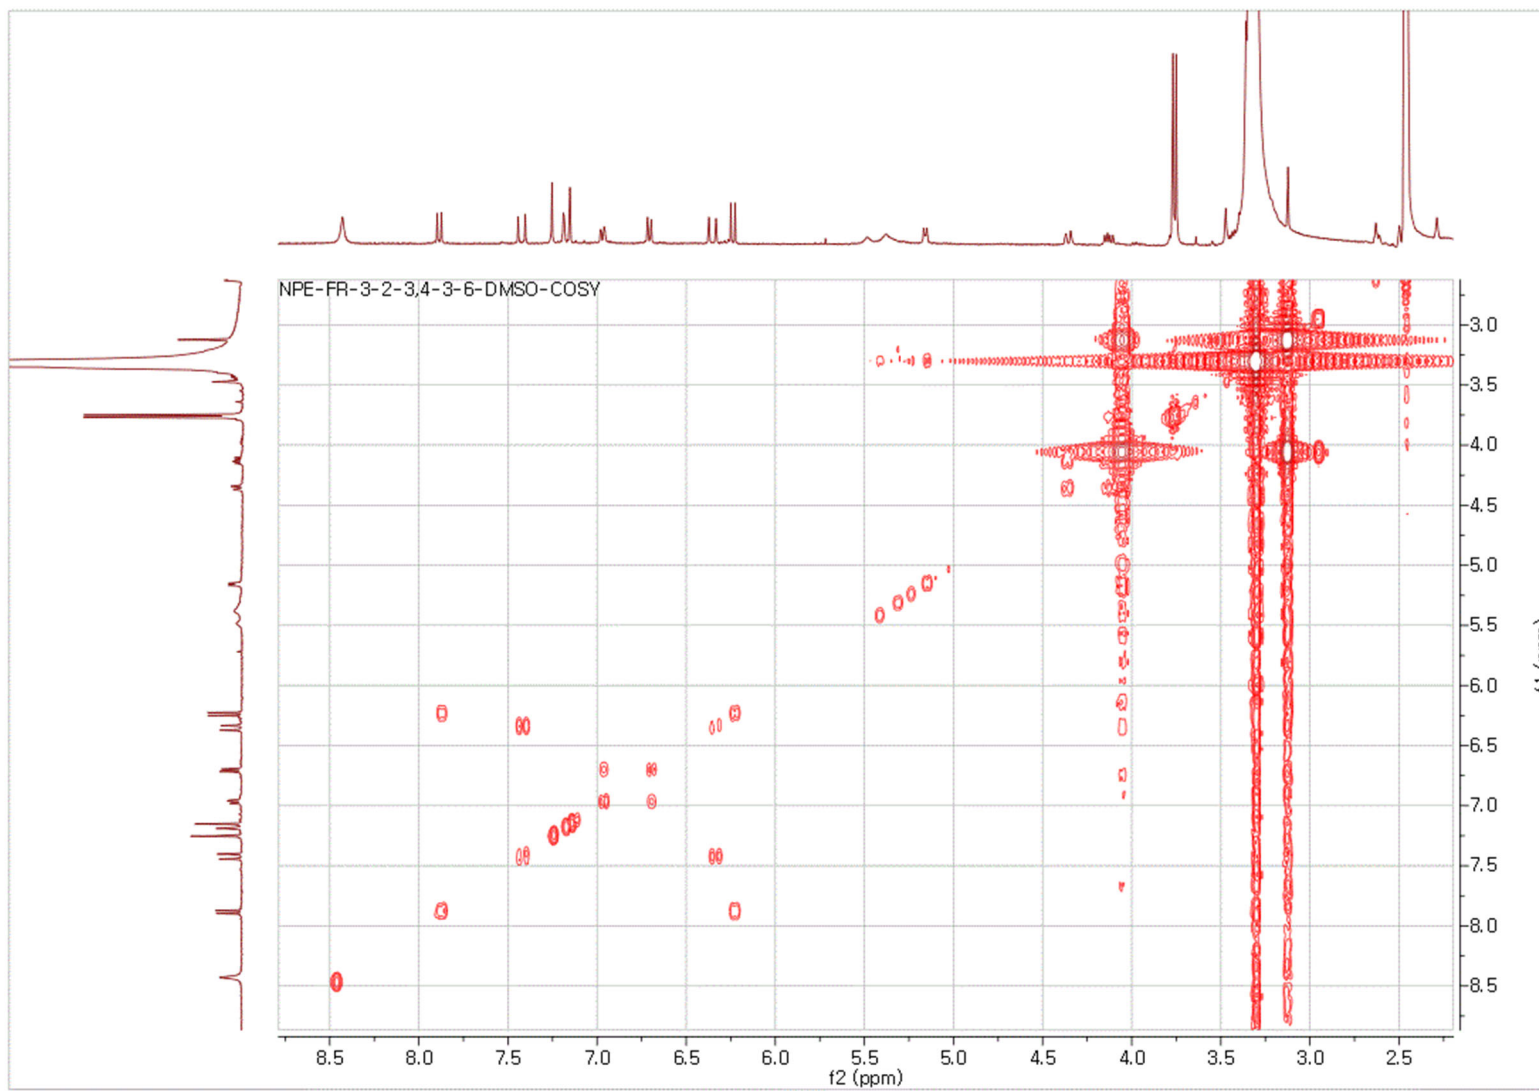

**Figure S16.** HSQC spectrum of **6** in DMSO-*d*<sub>6</sub>

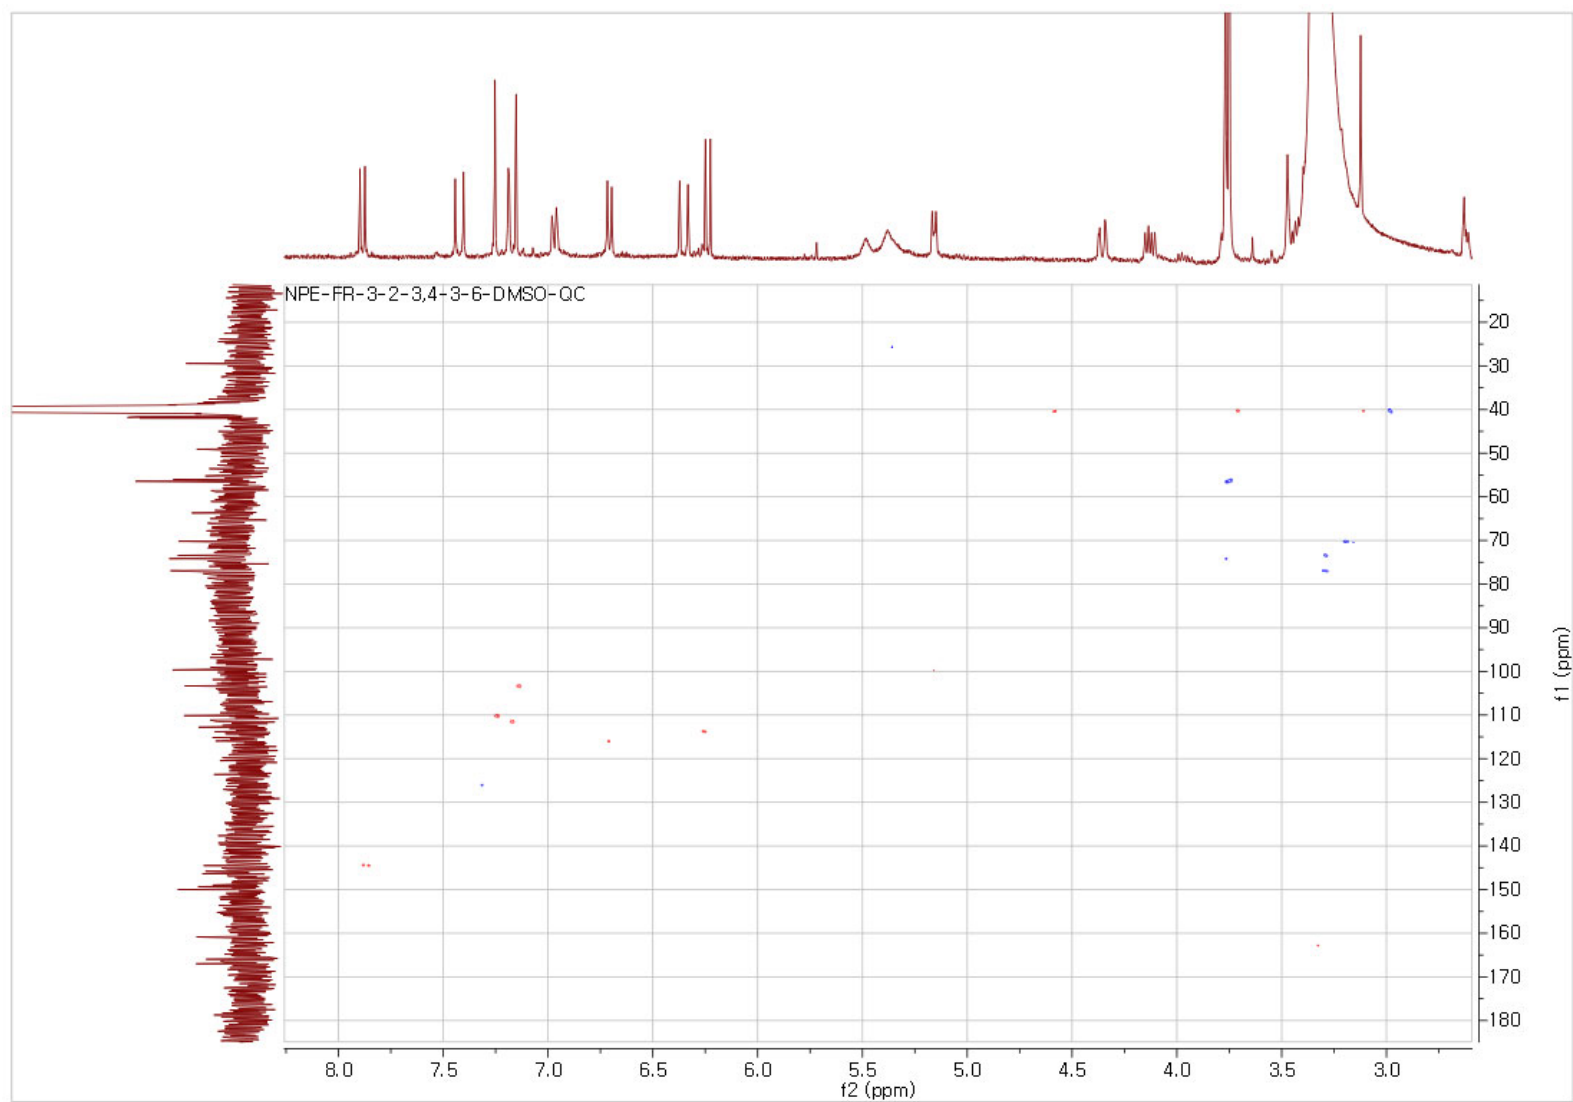

**Figure S17.** HMBC spectrum of **6** in DMSO-*d*<sub>6</sub>

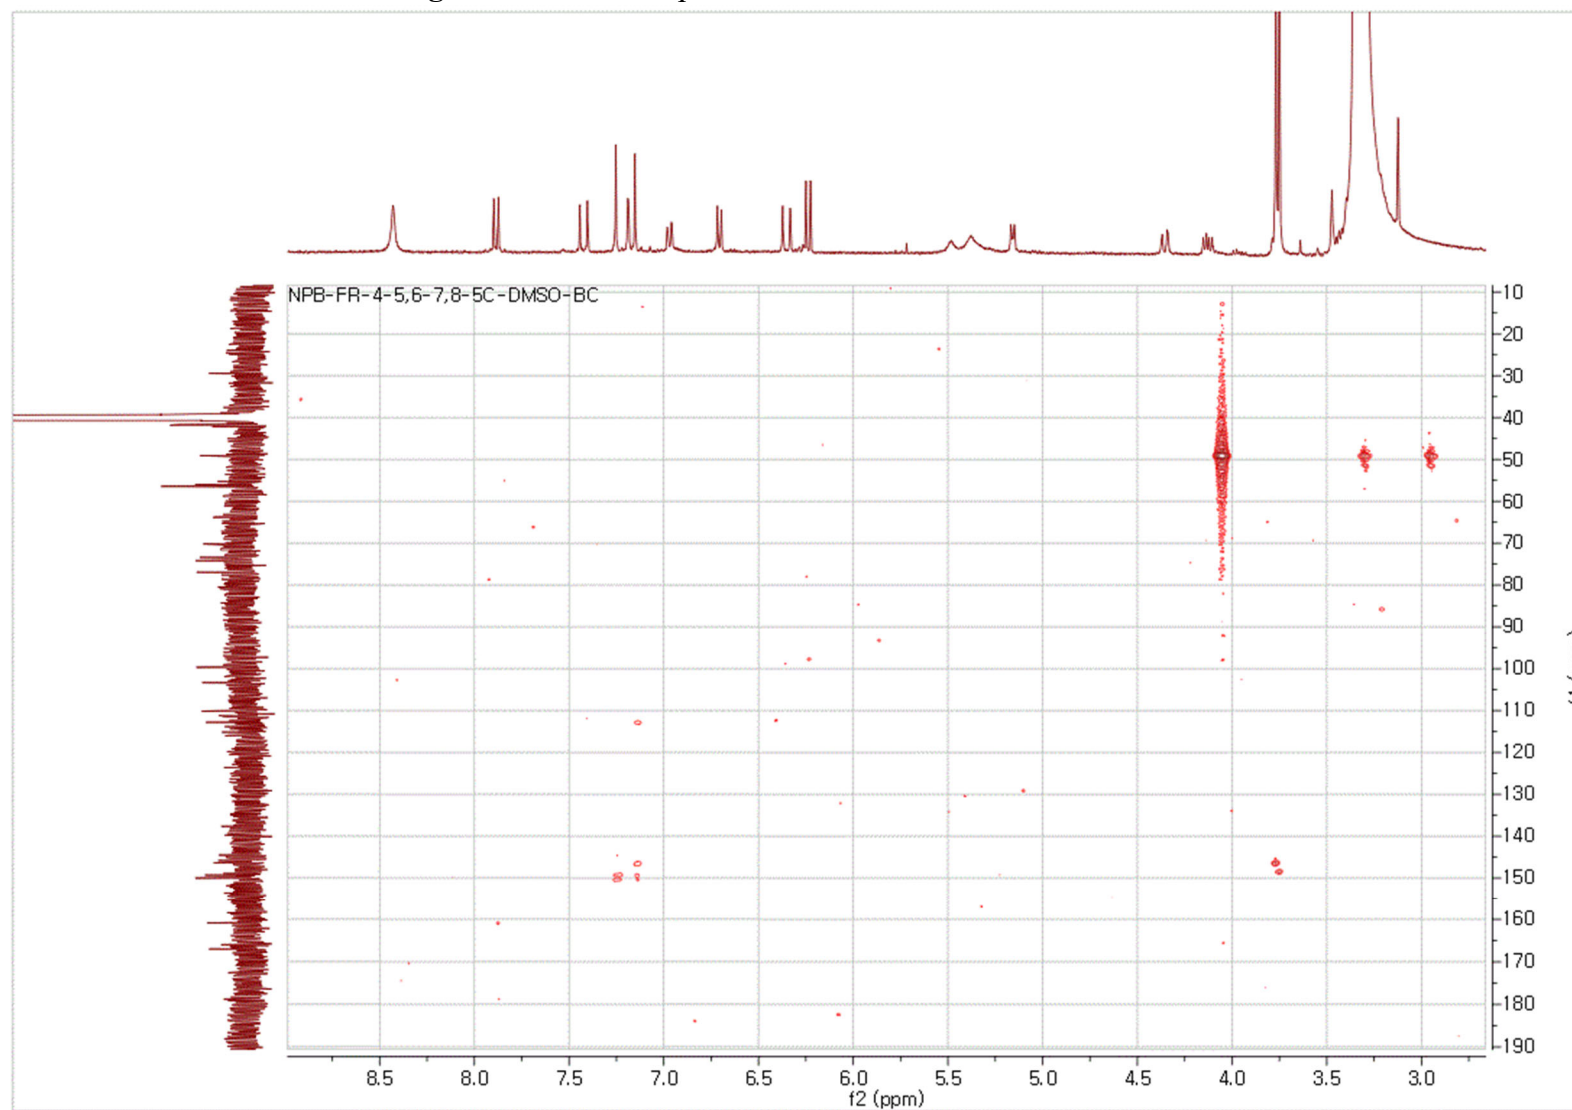

**Figure S18.** UV/PDA spectrum of **6**

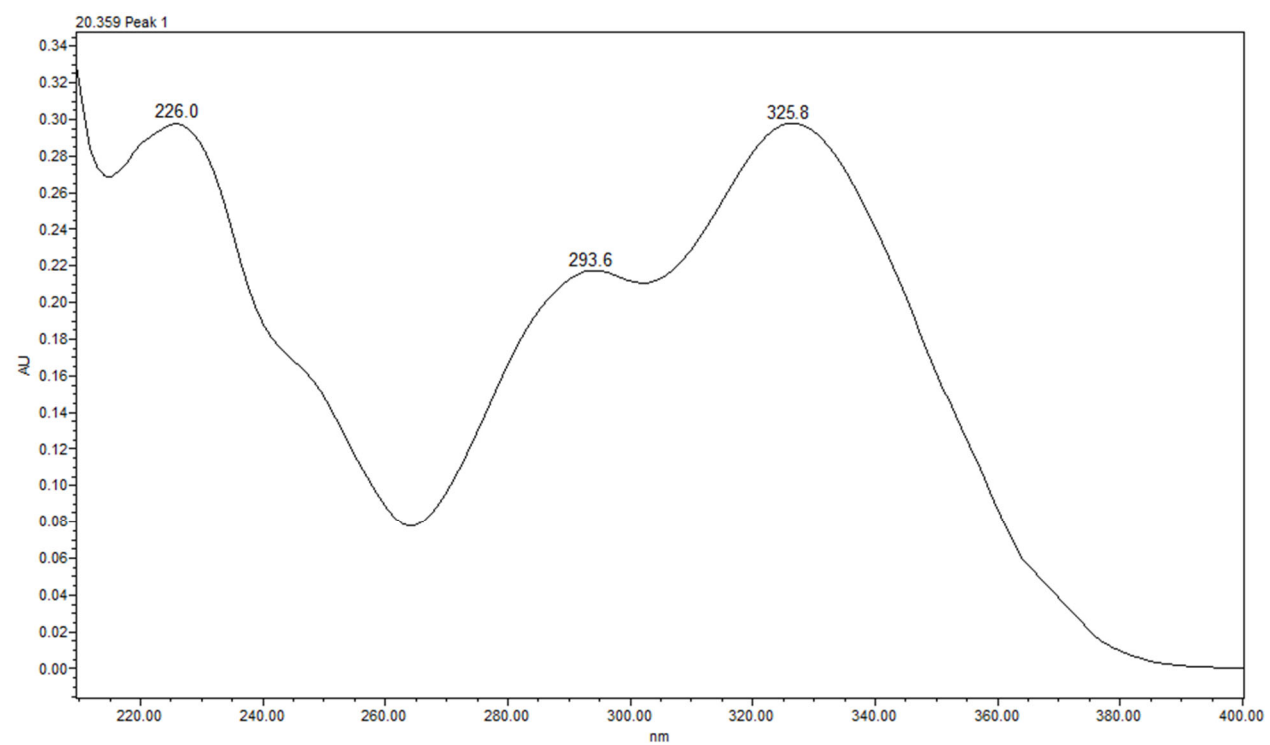

**Figure S19.** Wound healing area of compounds isolated from *N. peltata*

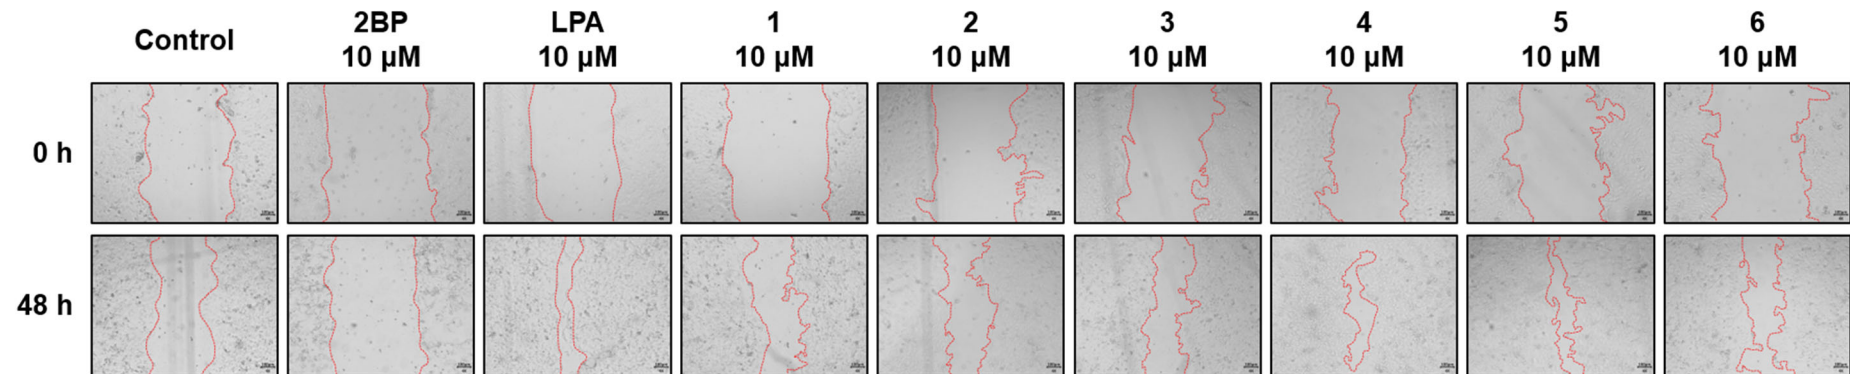

Supplement: s1 [file s1]
